# Supplementary material for: Regulation of multi-condensates miscibility is required for limiting transgenerational epigenetic inheritance
Source: Research Square preprint supplement (doi:10.21203/rs.3.rs-3445846/v1), 2023-10-27
Supplement: Supplementary file 1 [file 9e9c2638ae59ecd652073300.xlsx]

## Sheet: Description
Supplemental Table 2. C. elegans strains, bacteria strains and oligos used in this study.
Sheet #	Sheet Name	Description
1	C. elegans strains	All C. elegans strains used in this study
2	Bacteria strainss	All bacteria strains used in this study
3	Oligos	All DNA oligos used for pUG PCR assays and pUG FISH

## Sheet: 1. C. elegans strains
strain	genotype	source
N2(ancestrial)	Wild type	CGC
WAN459	znfx-1(ths236[ha::turboID::znfx-1])	This study
WAN266	pgl-1(ths151[pgl-1::turboID::ha])	This study
WAN267	mut-16(ths155[mut-16::turboID::ha])	This study
YY1287	znfx-1(gg611[ha::znfx-1])	Scott Kennedy's laboratory
WAN346	pgl-1(ths151[pgl-1::turboID::ha]) ; znfx-1(gg544[3xflag::gfp::znfx-1])	This study
WAN648	T26A5.2(ths364)	This study
WAN1397	T26A5.2a.1(ths714(T26A5.2a.1::ha]); znfx-1(gg544[3xflag::gfp::znfx-1])	This study
WAN1398	T26A5.2a.1(ths714(T26A5.2a.1::ha])	This study
WAN780	W05F2.6 (ths423)	This study
WAN1399	W05F2.6(ths716[W05F2.6::ha]); znfx-1(gg544[3xflag::gfp::znfx-1])	This study
WAN1400	W05F2.6(ths716[W05F2.6::ha])	This study
WAN755	Y66D12A.19.1(ths402)	This study
WAN1499	Y66D12A.19.2::HA(ths754);znfx-1(gg544[3xflag::gfp::znfx-1])	This study
WAN1500	Y66D12A.19.2::HA(ths754)	This study
WAN659	H05L14.2(ths282);	This study
WAN1416	H05L14.2(ths341[H05L14.2::gfp]);znfx-1(gg611[ha::znfx-1])	This study
WAN563	H05L14.2::gfp	This study
WAN303	D2005.4[ths180]	This study
WAN1501	D2005.4.1::HA(ths791);znfx-1(gg544[3xflag::gfp::znfx-1])	This study
WAN1502	D2005.4.1::HA(ths791);	This study
WAN949	F55A12.5 (ths536)	This study
WAN1420	F55A12.5(ths727[ha::F55A12.5]);znfx-1(gg544[3xflag::gfp::znfx-1])	This study
WAN569	mip-2 (ths285)	This study
WAN481	mip-2(ths261[3xflag::gfp::mip-2])	This study
YY1683	zsp-1(gg682)	Scott Kennedy's laboratory
WAN480	mip-2(ths261[3xflag::gfp::mip-2]); znfx-1(gg634[ha::tagrfp::znfx-1])	This study
WAN482	mip-2(ths261[3xflag::gfp::mip-2]);pgl-1(gg547[pgl-1::3xflag::tagrfp])	This study
WAN681	herd-1(ths351);	This study
YY968	pgl-1(gg547[pgl-1::3xflag::tagrfp]); znfx-1(gg544[3xflag::gfp::znfx-1])	Scott Kennedy's laboratory
JH3571	mut-16::gfp	Scott Kennedy's laboratory
SHG2440	simr-1(vst365[simr-1::tagrfp])	Shouhong Guang's laboratory
WAN1929	lotr-1(ths975);znfx-1(gg544(3xflag::gfp::znfx-1)	This study
WAN1933	lotr-1(ths979);pgl-1(gg547[pgl-1::3xflag::tagrfp])	This study
WAN1939	lotr-1(ths985);simr-1(vst365[simr-1::tagrfp])	This study
WAN1926	lotr-1(ths973);mut-16::gfp	This study
SX461	pie-1::gfp::h2b (mjIs31 II); unc-119(ed3) III	Scott Kennedy's laboratory
WAN467	hrde-1(tm1200); pie-1::gfp::h2b (mjIs31 II); unc-119(ed3) III	This study
WAN679	herd-1(ths351);pie-1::gfp::h2b (mjIs31 II); unc-119(ed3) III	This study
WAN1603	thsIS29(pie-1p::mcherry::h2b::tbb-2 3'UTR II); unc-119(ed3) III	This study
WAN1604	hrde-1(tm1200); thsIS29(pie-1p::mcherry::h2b::tbb-2 3'UTR II); unc-119(ed3) III	This study
WAN1605	herd-1(ths351);thsIS29(pie-1p::mcherry::h2b::tbb-2 3'UTR II); unc-119(ed3) III	This study
WAN1735	znfx-1(ths859);thsIS29(pie-1p::mcherry::h2b::tbb-2 3'UTR II) unc-119(ed3) III	This study
WAN1286	herd-1(ths680[3xflag::gfp::herd-1])	This study
WAN1353	herd-1(ths680[3xflag::gfp::herd-1])；pgl-1(gg547[PGL-1::3xflag::tagrfp])	This study
WAN1354	herd-1(ths680[3xflag::gfp::herd-1])；znfx-1(gg634[ha::tagrfp::znfx-1])	This study
YY1492	mut-16(cmp3[mut-16::gfp::flag + loxP] I; znfx-1(gg634[HA::tagrfp::znfx-1]) II; pgl-1(gg640[pgl-1::3xflag::mCardinal]) IV	CGC
WAN1743	herd-1(ths899);mut-16(cmp3[mut-16::gfp::flag + loxP] I; znfx-1(gg634[HA::tagrfp::znfx-1]) II; pgl-1(gg640[pgl-1::3xflag::mCardinal]) IV	This study
WM30	mut-2(ne298)	CGC
YY996	znfx-1(gg561)	Scott Kennedy's laboratory
WAN392	mut-16(ths206[mut-16::ha])	This study
WAN1861	mut-16(ths960[mut-16::nanobody::ha])	This study
WAN1355	herd-1(ths351);znfx-1(gg544[3xflag::gfp::znfx-1]);mut-16(ths206[mut-16::ha])	This study
WAN1356	znfx-1(gg544[3xflag::gfp::znfx-1]);mut-16(ths206[mut-16::ha])	This study
NL1810	mut-16(pk710)	CGC
YY916	znfx-1(gg544[3xflag::gfp::znfx-1])	Scott Kennedy's laboratory
YY1611	pgl-1(gg656[pgl-1::gfp::3xflag])	Scott Kennedy's laboratory
WAN1862	mut-16(ths960[mut-16::nanobody::ha]); znfx-1(gg544(3xflag::gfp::znfx-1)	This study
WAN1863	mut-16(ths960[mut-16::nanobody::ha]); mip-2(ths261[3xflag::gfp::mip-2])	This study
WAN1900	mut-16(ths960[mut-16::nanobody::ha]); thsIS29(pie-1p::mcherry::h2b::tbb-2 3'UTR II); pgl-1(gg656[pgl-1::gfp::3xflag])	This study
WAN1942	znfx-1(gg544(3xflag::gfp::znfx-1);thsIS29(pie-1p::mcherry::h2b::tbb-2 3'UTR II)	This study
WAN1944	thsIS29(pie-1p::mcherry::h2b::tbb-2 3'UTR II; mip-2(ths261[3xflag::gfp::mip-2])	This study
WAN1921	thsIS29(pie-1p::mcherry::h2b::tbb-2 3'UTR II); pgl-1(gg656[pgl-1::gfp::3xflag])	This study
WAN1902	mip-2(ths261[3xflag::gfp::mip-2]); mut-16(ths960[mut-16::nanobody::ha]); thsIS29(pie-1p::mcherry::h2b::tbb-2 3'UTR II);	This study
WAN1920	mut-16(ths960[mut-16::nanobody::ha]); thsIS29(pie-1p::mcherry::h2b::tbb-2 3'UTR II); pgl-1(gg656[pgl-1::gfp::3xflag])	This study
WAN1945	thsIS29(pie-1p::mcherry::h2b::tbb-2 3'UTR II; znfx-1(ths968[3xflag::gfp::znfx-1]);mut-16(ths960[mut-16::nanobody::ha])	This study
SS579	pgl-1(bn101)	Scott Kennedy's laboratory
WAN33	simr-1(ths6[ha::simr-1])	This study
WAN83	simr-1(ths11[ha::turboID::simr-1])	This study
WAN90	simr-1(ths39)	This study
WAN236	simr-1(ths116[simr-1::turboID::ha])	This study
WAN748	hpo-40(ths395)	This study
WAN717	F01G4.4a.1 (ths290)	This study
WAN642	B0001.3(ths358)	This study
WAN645	B0001.5(ths361)	This study
WAN804	F52D2.12 (ths438)	This study
WAN615	M01F1.8a.1(ths355)	This study
WAN784	pqn-53 (ths427)	This study
WAN781	F30F8.1 (ths424)	This study
WAN649	Y48G10A.2(ths365)	This study
WAN785	Y57A10A.13 (ths428)	This study
WAN655	C36B1.11(ths371)	This study
WAN738	D2005.7(ths385)	This study
WAN766	F56C9.6 (ths410)	This study
WAN651	B0261.7.1(ths367)	This study
WAN763	ubr-4 deletion (ths407)	This study
WAN740	gln-3(ths387)	This study
WAN742	M142.5(ths389)	This study
WAN820	H05C05.1(ths448)	This study
WAN777	Y37A1B.17 (ths420)	This study
WAN612	B0001.8(ths352)	This study
WAN945	C15C6.2 (ths532)	This study
WAN1046	dyrb-1(ths609)	This study
WAN641	ani-3(ths357)	This study
WAN951	arf-6 (ths538)	This study
WAN1000	D1086.3(ths576)	This study
WAN954	ubr-5(ths541)	This study
WAN955	rnp-3 (ths542)	This study
WAN959	Y66D12A.16 (ths546)	This study
WAN962	pid-5 (ths549)	This study
WAN740	gln-3(ths387)	This study
WAN965	bath-40 (ths552)	This study
WAN968	nspd-10 (ths555)	This study
WAN969	ZC247.1 (ths556)	This study
WAN972	C33G3.6 (ths559)	This study
WAN975	pfd-4 (ths562)	This study
WAN977	F49E2.2 (ths564)	This study
WAN978	ppk-3 (ths565)	This study
WAN709	app-1(ths372)	This study
WAN956	Y48C3A.14 (ths543)	This study
WAN750	F44E2.8(ths397)	This study
YY1325	wago-4(gg620[3xflag::gfp::wago-4])	Scott Kennedy's laboratory
WAN2027	glh-1(ths292);mut-16::gfp	This study
WAN2028	glh-1(ths292);simr-1(vst365[simr-1::tagrfp])	This study
WAN2029	deps-1(ths843);mut-16::gfp	This study
WAN2030	deps-1(ths843);simr-1(vst365[simr-1::tagrfp])	This study
WAN1504	pie-1::gfp::h2b (pkIs32);herd-1(ths351)	This study
WAN1317	hrde-1(ths685),pie-1::gfp::h2b (pkIs32)	This study
YY513	pie-1::gfp::h2b (pkIs32)	Scott Kennedy's laboratory
SX1316	mex-5p::gfp::his-58::21UR-1target::tbb-2 3’UTR II piRNA sensor strain	Scott Kennedy's laboratory
WAN680	herd-1(ths351);mex-5p::gfp::his-58::21UR-1target::tbb-2 3’UTR II	This study
WAN686	mex-5p::gfp::his-58::21UR-1target::tbb-2 3’UTR II ; hrde-1(tm1200)	This study
WAN1922	pgl-1(gg656[pgl-1::gfp::3xflag]);herd-1(ths351)	This study
WAN1576	znfx-1(gg544[3xflag::gfp::znfx-1]);mut-2(ths806[ha::mut-2]);herd-1(ths351)	This study
WAN1577	znfx-1(gg544[3xflag::gfp::znfx-1]);mut-2(ths806[ha::mut-2]);herd-1(ths351)	This study
WAN1578	herd-1(ths351);mut-16::gfp;znfx-1(gg634[ha::tagrfp::znfx-1])	This study
WAN1579	mut-16::gfp;znfx-1(gg634[HA::tagrfp::znfx-1])	This study
WAN1866	herd-1(ths351);simr-1(vst365[simr-1::tagrfp])	This study
		This study

## Sheet: 2. Bacteria strains
strain	genotype	source
OP50	Wild type	Scott Kennedy's laboratory
HT115	Wild type	Scott Kennedy's laboratory
bWAN7	bio-B deleted	Author's laboratory
pos-1	dsRNA for pos-1	Author's laboratory
lotr-1	dsRNA for lotr-1	Dharmacon
mip-1	dsRNA for mip-1	Dharmacon
mip-2	dsRNA for mip-2	Dharmacon
gfp	dsRNA for gfp	Author's laboratory
mcherry	dsRNA for mcherry	Author's laboratory
dpy-6	dsRNA for dpy-6	Author's laboratory

## Sheet: 3. Oligos
Name	Sequence	Purpose	Source
pUG PCR RT oligo	GCTATGGCTGTTCTCATGGCGGCGTCGCCATATTCTACTTCACACACACACACACACA	pUG RT adapter	Shukla et al., 2020
reverse primer for 1st PCR	GCT ATG GCT GTT CTC ATG GC	pUG adpater 1 reverse	Shukla et al., 2020
reverse primer for 2nd PCR	GGC GTC GCC ATA TTC TAC TT	pUG adapter 2 reverse	Shukla et al., 2020
gfp 1st PCR	ATG AGT AAA GGA GAA GAA CT	gfp f1 primer for pUG PCR	Shukla et al., 2020
gfp 2nd PCR	TTTCACTGGAGTTGTCCCAA	gfp f2 primer for pUG PCR	Shukla et al., 2020
gsa-1 1st PCR	GAG TTC TAC GAT CAC ATT CT	gsa-1 f1 primer for pUG PCR	Shukla et al., 2020
gsa-1 2nd PCR	CAC TTG CTG GAA AGA CAA GG	gsa-1 f2 primer for pUG PCR	Shukla et al., 2020
pZCF-P1100	atggtctcaaagggtgaaga	mcherry pUG assay 1st	This study
pZCF-P1101	agataacatggcaattatta	mcherry pUG assay 2nd	This study
pZCF-P1142	5'-Cy5-CACACACACACACACACACA	pUG RNA FISH probe	Shukla et al., 2020
