# Supplementary material for: Regulation of multi-condensates miscibility is required for limiting transgenerational epigenetic inheritance
Source: Research Square preprint supplement (doi:10.21203/rs.3.rs-3445846/v1), 2023-10-27
Supplement: Supplementary file 2 [file ca3e50aec5c4a06c9941b751.xlsx]

## Sheet: Description
Supplemental Table 1. P granules, Z granules and Mutator foci components as revealed by TurboID mediated proximity biotin labeling.

## Sheet: P granules component
Gene_name	Uniprot_ID	WT_vs_PGL-1-TurboID_p.val	PGL-1-TurboID_vs_MUT-16-TurboID_p.val	WT_vs_PGL-1-TurboID_ratio	PGL-1-TurboID_vs_MUT-16-TurboID_ratio	WT_centered	PGL-1-TurboID_centered	MUT-16-TurboID_centered	TurboID-ZNFX-1_centered
pgl-2	P34266	6.41e-15	3.71e-12	-8.86	5.66	-4.54	4.31	-1.35	1.58
W05F2.6	Q9TYT7	3.69e-13	2.88e-12	-6.77	5.85	-2.63	4.14	-1.72	0.21
Y37H2A.1	Q9U2N7	2.29e-11	8.97e-11	-6.19	5.61	-2.14	4.05	-1.56	-0.355
pgl-1	Q304E5	1.73e-16	2.4e-11	-10	4.35	-6	4	-0.346	2.34
rnp-3	Q21323	1.68e-11	1.8e-11	-5.3	5.27	-1.32	3.97	-1.3	-1.35
glh-2	Q966L9	4.93e-15	4.42e-14	-6.55	5.62	-2.72	3.83	-1.78	0.665
T26A5.2	H2KYG8	2.09e-13	4.39e-13	-6.65	6.31	-2.82	3.83	-2.49	1.48
erh-2	Q20057	2.82e-08	1.27e-06	-7.16	5.28	-3.34	3.82	-1.46	0.979
D2005.4	Q93410	6.94e-15	7.22e-11	-8.51	4.42	-4.73	3.78	-0.639	1.59
glh-1	P34689	1.33e-15	9.28e-15	-6.42	5.6	-2.74	3.68	-1.93	0.989
Y66D12A.19	Q95PZ6	4.3e-15	2.76e-12	-7.54	4.78	-3.87	3.67	-1.12	1.33
saps-1	B2D6K9	2.54e-15	5.25e-12	-6.5	3.8	-2.88	3.62	-0.177	-0.568
mip-1	Q18509	6.82e-13	2.23e-11	-7.48	5.84	-4	3.48	-2.36	2.87
D2005.7	B3WFW4	4.62e-11	3.68e-11	-5.35	5.44	-1.91	3.45	-2	0.455
ego-1	G5EBQ3	2.43e-14	0.00225953	-9.55	1.2	-6.2	3.35	2.15	0.703
mex-1	G5ECB9	1.22e-12	6.16e-08	-6.03	2.72	-2.73	3.3	0.584	-1.16
eif-2A	Q19052	6.95e-13	1.43e-11	-5.65	4.56	-2.42	3.23	-1.32	0.51
F59A3.12	P91357	1.15e-10	9.5e-11	-5.46	5.54	-2.27	3.19	-2.35	1.42
Y48C3A.14	H1UBJ9	4.19e-10	4.16e-08	-4.83	3.42	-1.65	3.18	-0.24	-1.29
mel-47	Q09293	5.1e-10	6.29e-09	-5.37	4.45	-2.2	3.17	-1.29	0.321
rde-12	P90897	3.23e-11	3.09e-10	-6.18	5.25	-3.02	3.16	-2.09	1.94
rha-1	A0A486WUJ5	1.03e-13	9.74e-11	-5.71	3.51	-2.55	3.16	-0.35	-0.254
pid-1	Q19541	6.34e-12	7.11e-11	-5.05	4.24	-1.9	3.15	-1.09	-0.164
Y50D4C.3	Q965Q9	2.59e-09	1.96e-09	-4.25	4.34	-1.11	3.15	-1.2	-0.836
F44E2.8	P34438	1.08e-12	1.72e-09	-6.22	3.65	-3.14	3.08	-0.568	0.623
Y66D12A.16	A0A0K3AXA5	2.65e-12	9.35e-08	-6.12	2.83	-3.07	3.06	0.23	-0.216
pid-3	O76616	6.58e-12	5.51e-10	-5.46	3.97	-2.41	3.06	-0.91	0.26
pid-5	Q9GUI6	7.27e-12	2.17e-10	-6.12	4.79	-3.07	3.05	-1.74	1.77
ddx-19	Q22308	4.96e-14	2.04e-12	-5.31	4.09	-2.27	3.04	-1.04	0.27
cid-1	Q09409	0.00104842	4.06e-06	-3.3	5.78	-0.261	3.04	-2.74	-0.0378
C27B7.5	Q18244	9.42e-13	1.5e-06	-7.12	2.44	-4.1	3.02	0.585	0.494
glh-3	O01836	1.87e-09	3.08e-08	-6.08	4.91	-3.11	2.97	-1.95	2.09
sart-3	Q17430	6.52e-12	2.7e-10	-5.03	3.85	-2.08	2.96	-0.892	0.012
tost-1	Q18490	2e-09	2.85e-07	-5.71	3.9	-2.75	2.96	-0.935	0.724
glh-4	O76743	2.6e-16	3.08e-11	-8.53	3.75	-5.59	2.94	-0.809	3.46
F56C9.6	H2KY87	2.15e-11	5.27e-08	-6.13	3.43	-3.19	2.94	-0.491	0.733
C36B1.11	Q93345	5.24e-10	3.6e-10	-4.71	4.84	-1.8	2.91	-1.93	0.816
F59G1.8	A7LPD5	7.67e-09	5.12e-06	-5.02	2.97	-2.14	2.88	-0.0929	-0.647
bath-28	Q6A585	5.03e-09	5.03e-09	-3.74	3.74	-0.916	2.82	-0.916	-0.992
Y24F12A.1	N1NTK1	1.14e-09	7.96e-10	-3.8	3.91	-1.01	2.79	-1.11	-0.666
cey-3	P91398	2.26e-13	1.27e-10	-5.1	3.25	-2.35	2.76	-0.489	0.0751
alh-11	Q20352	3.06e-10	9.72e-05	-5.41	1.91	-2.66	2.74	0.832	-0.913
prp-8	P34369	8.02e-13	8.71e-08	-6.27	2.67	-3.62	2.65	-0.0217	0.99
F02E8.4	Q19122	3.21e-10	1.07e-08	-4.16	3.2	-1.51	2.65	-0.556	-0.579
F52B5.3	Q20644	8.89e-14	2.13e-07	-6.48	2.2	-3.86	2.62	0.413	0.834
Y111B2A.3	Q9NEM5	4.66e-10	2.52e-10	-5.77	6.03	-3.16	2.61	-3.42	3.97
puf-5	Q20757	1.01e-14	5.46e-11	-4.78	2.6	-2.19	2.59	-0.0122	-0.386
spas-1	G5EEF8	1.38e-08	2.51e-08	-3.69	3.53	-1.1	2.59	-0.935	-0.557
prg-1	P90786	1.36e-09	3.97e-07	-5.84	3.77	-3.28	2.57	-1.21	1.92
nol-1	Q9TYV5	1.92e-06	0.000281839	-4.02	2.51	-1.47	2.55	0.0427	-1.12
pph-6	Q09496	1.13e-06	6.54e-05	-3.93	2.73	-1.39	2.54	-0.189	-0.958
stl-1	H2FLJ1	5.94e-10	2.09e-07	-4	2.56	-1.47	2.53	-0.0296	-1.03
F40F8.11	H2L297	3.19e-08	9.05e-07	-4.4	3.37	-1.88	2.52	-0.852	0.216
Y57A10A.31	Q9NA71	3.32e-10	3.64e-11	-4.14	4.86	-1.66	2.48	-2.38	1.56
nifk-1	Q22135	0.000103788	0.00984804	-5.31	2.98	-2.84	2.47	-0.516	0.886
erfa-3	O45622	2.71e-14	1.51e-05	-7.1	1.55	-4.64	2.46	0.918	1.26
snr-1	Q17348	9.92e-07	8.22e-06	-4.03	3.35	-1.57	2.46	-0.896	0.00478
gls-1	Q8I4M5	2.1e-13	1.02e-05	-6.54	1.7	-4.1	2.44	0.733	0.932
drh-3	Q93413	1.36e-13	0.000765768	-6.25	1.02	-3.82	2.43	1.41	-0.0231
mip-2	P90898	6.2e-11	1.4e-10	-5.14	4.84	-2.72	2.42	-2.42	2.71
sft-4	Q18864	1.07e-06	2.78e-06	-3.81	3.52	-1.4	2.42	-1.1	0.0789
larp-1	D5MCN2	3.62e-12	0.000939078	-6.01	1.2	-3.59	2.41	1.21	-0.0253
F07H5.10	Q19174	7.33e-08	1.35e-07	-3.25	3.1	-0.853	2.4	-0.7	-0.845
alg-3	G5EC94	2.74e-08	4.82e-07	-3.51	2.8	-1.12	2.39	-0.406	-0.869
snr-6	Q9XTU6	4.96e-08	1.2e-06	-3.81	2.95	-1.43	2.38	-0.57	-0.378
tiar-1	Q95QV8	6.3e-13	1.06e-05	-5.33	1.5	-2.96	2.37	0.875	-0.284
elli-1	D3YT16	9.93e-06	0.000517054	-4.06	2.73	-1.7	2.36	-0.367	-0.299
mdt-4	Q23523	1.45e-14	1.82e-06	-6.76	1.7	-4.4	2.35	0.658	1.39
dnj-11	Q94216	3.2e-14	6.31e-05	-7.62	1.46	-5.29	2.33	0.864	2.1
cey-1	O62213	7.11e-09	6.68e-05	-4.93	2.29	-2.61	2.32	0.0326	0.258
Y69A2AR.32	H2L0S1	8.46e-09	2.06e-07	-3.66	2.86	-1.34	2.32	-0.539	-0.435
smn-1	G5EC16	2.13e-09	5.33e-07	-4.07	2.65	-1.76	2.32	-0.336	-0.226
H05C05.1	H2L0A8	5.88e-09	0.0158218	-5.64	1.28	-3.34	2.31	1.03	-0.00206
ugt-62	Q21603	3.2e-07	1.3e-06	-3.32	2.96	-1.02	2.29	-0.661	-0.611
ppfr-4	Q9N4E9	1.62e-13	5.31e-07	-5.74	1.89	-3.47	2.28	0.385	0.806
F26G5.1	B1GRK6	4.63e-07	1.12e-06	-3.39	3.15	-1.13	2.26	-0.89	-0.245
Y71F9AL.12	Q9N4I5	7.54e-12	3.07e-06	-5.38	2.01	-3.13	2.25	0.243	0.634
smg-2	O76512	7.16e-14	6.92e-05	-6.02	1.21	-3.77	2.25	1.03	0.495
mog-2	Q9BLB6	9.04e-13	4.87e-11	-4.03	3.03	-1.79	2.24	-0.789	0.334
ekl-4	Q8WQA7	6.75e-07	2.23e-06	-3.25	2.94	-1.01	2.24	-0.704	-0.519
klp-18	G5EBX0	9.13e-06	0.00278792	-5.57	3.01	-3.32	2.24	-0.764	1.84
sepa-1	G5EC37	0.000117108	0.000187156	-3.39	3.23	-1.15	2.24	-0.992	-0.0943
psf-2	O62193	2.52e-13	4.63e-09	-4.59	2.26	-2.37	2.23	-0.0333	0.173
A5JYZ2	A5JYZ2	2.54e-08	3.44e-07	-3.5	2.85	-1.27	2.23	-0.617	-0.349
snr-2	P91918	2.34e-07	6.28e-06	-4.19	3.18	-1.96	2.23	-0.949	0.681
hcp-1	O76447	8.03e-12	0.00391615	-6.96	1.22	-4.8	2.17	0.944	1.69
cas-2	O02096	1.66e-06	1.48e-06	-3.18	3.21	-1.03	2.16	-1.06	-0.0749
K02B12.7	P90904	5.64e-13	1.39e-05	-5.5	1.49	-3.36	2.14	0.642	0.587
plp-1	Q94230	1.95e-11	1.34e-07	-4.56	2.36	-2.42	2.14	-0.217	0.494
Y54G11A.3	Q9XVZ6	6.29e-10	7.22e-11	-2.84	3.32	-0.703	2.14	-1.19	-0.244
Y48G1A.1	Q9N3Q5	4.27e-07	0.00035711	-3.63	1.94	-1.48	2.14	0.201	-0.863
efl-2	A5HWA8	9.01e-12	2.9e-10	-3.72	2.9	-1.59	2.13	-0.764	0.219
Q9U284	Q9U284	1.2e-08	5.45e-10	-4.1	5.16	-1.97	2.13	-3.03	2.88
Q18089	Q18089	9.06e-08	3.58e-08	-2.85	3.06	-0.72	2.13	-0.934	-0.473
fbf-2	Q09312	7.9e-11	0.000394552	-3.94	1.09	-1.83	2.11	1.02	-1.3
B0001.2	Q17411	4.34e-10	8.3e-07	-4.1	2.29	-2	2.1	-0.188	0.0857
Q17329	Q17329	1.2e-08	1.03e-09	-3.38	4.06	-1.28	2.09	-1.96	1.16
npp-16	Q7K6X4	2.87e-12	3.46e-06	-5.18	1.79	-3.11	2.07	0.287	0.748
rpn-11	O76577	1.04e-09	0.00215175	-5.32	1.44	-3.25	2.07	0.632	0.54
hrp-2	Q9NLD1	8.34e-07	1.66e-05	-3.35	2.58	-1.28	2.07	-0.511	-0.279
ttll-15	Q21279	9.39e-06	1.87e-05	-3.17	2.97	-1.1	2.06	-0.911	-0.047
F10B5.2	Q09305	1.78e-08	6.36e-08	-3.06	2.78	-1.01	2.05	-0.724	-0.32
K12D12.5	G5ED63	4.08e-12	1.93e-12	-3.47	3.66	-1.43	2.04	-1.62	1.01
smi-1	Q9N405	9.23e-09	3.85e-08	-3.41	3.05	-1.36	2.04	-1.01	0.329
unc-89	A0A2C9C2W9	1.12e-08	2.55e-07	-3.01	2.36	-0.974	2.03	-0.324	-0.734
hil-5	O01833	1.34e-06	0.00123275	-4.02	2.05	-2	2.02	-0.0308	0.0181
fkb-6	O45418	3e-13	1.01e-05	-5.8	1.55	-3.8	2	0.446	1.36
riok-1	O44959	0.000107578	0.0019811	-3.14	2.24	-1.16	1.98	-0.269	-0.547
ifg-1	B5BM23	2.92e-12	9.78e-10	-3.5	2.3	-1.54	1.97	-0.336	-0.0929
spk-1	M1ZJY1	9.85e-07	2.34e-06	-2.87	2.67	-0.899	1.97	-0.698	-0.375
M01H9.3	H2L0G8	1.01e-09	0.00212053	-5.2	1.41	-3.24	1.96	0.546	0.741
aspm-1	O17666	1.42e-06	2.89e-05	-3.07	2.35	-1.11	1.96	-0.391	-0.453
lys-1	O62415	0.00139677	0.0054743	-2.47	2.05	-0.516	1.96	-0.0903	-1.35
gld-4	G5EFL0	1.91e-11	1.62e-05	-4.71	1.62	-2.76	1.95	0.327	0.489
snr-3	Q10013	9.03e-10	9.72e-06	-4.18	1.99	-2.24	1.94	-0.0535	0.354
pid-2/zsp-1	Q9N3P1	1.14e-07	4.39e-06	-4.33	3.2	-2.39	1.93	-1.26	1.72
efk-1	O01991	1.96e-09	2.84e-07	-3.46	2.36	-1.53	1.93	-0.432	0.0409
K08F4.3	Q21352	3.8e-05	0.000197262	-3.58	3.04	-1.65	1.93	-1.11	0.83
wago-4	O62275	1.24e-13	1.78e-09	-4.45	2.24	-2.53	1.91	-0.321	0.939
skr-7	G5EDY3	3.71e-07	4.02e-07	-2.61	2.6	-0.718	1.9	-0.701	-0.478
dpy-30	Q10661	7.8e-05	5.5e-05	-3.15	3.26	-1.26	1.89	-1.37	0.745
ify-1	Q18235	6.82e-09	2.74e-08	-3.02	2.71	-1.12	1.89	-0.819	0.0481
klc-1	Q21592	1.89e-05	0.000235226	-2.8	2.18	-0.914	1.89	-0.292	-0.682
mel-46	G5ED26	3.4e-08	2.09e-06	-3.34	2.39	-1.46	1.88	-0.517	0.102
B0261.7	O01442	3.19e-13	1.33e-12	-3.56	3.22	-1.69	1.87	-1.35	1.17
F54D10.7	Q9TZ84	6.67e-10	1.9e-09	-2.92	2.7	-1.04	1.87	-0.827	-0.00403
cpn-1	G5EFB5	3.24e-06	6.18e-05	-3.55	2.71	-1.68	1.87	-0.835	0.638
imb-2	A0A131MBF9	1.21e-05	2.32e-05	-2.68	2.52	-0.814	1.87	-0.658	-0.394
Y39A3CL.4	G4SRU7	1.72e-09	0.000207062	-4.71	1.75	-2.85	1.86	0.112	0.878
B0207.6	O01426	1.14e-06	2.17e-06	-2.64	2.5	-0.792	1.85	-0.653	-0.405
pab-1	Q9U302	2.29e-12	9.16e-07	-4.13	1.57	-2.29	1.84	0.273	0.173
edg-1	Q17436	3.7e-11	3.47e-06	-4.77	1.98	-2.94	1.84	-0.14	1.24
edc-4	Q8ITV7	1.62e-11	0.000456511	-4.19	1.02	-2.35	1.84	0.82	-0.302
F22B5.10	Q19714	1.25e-05	9.61e-05	-3.6	2.96	-1.76	1.84	-1.12	1.05
akap-1	A0A2K5ATU5	1.65e-11	1.65e-05	-4.18	1.42	-2.35	1.83	0.41	0.109
let-716	Q18038	1.97e-10	7.4e-08	-3.61	2.31	-1.78	1.83	-0.481	0.428
C35D10.10	Q18484	1.78e-06	4.09e-06	-2.57	2.4	-0.741	1.83	-0.564	-0.529
F44E2.6	Q1W0S5	5.78e-05	0.00234736	-3	1.97	-1.17	1.83	-0.142	-0.519
smg-3	G5EDT8	2.78e-07	7.06e-07	-2.75	2.55	-0.912	1.83	-0.711	-0.211
T13F2.6	Q94049	9.54e-07	7.7e-07	-2.95	3	-1.13	1.82	-1.18	0.489
ced-5	G5EEN3	4.98e-08	1.54e-06	-2.92	2.21	-1.1	1.82	-0.393	-0.325
coq-3	O18235	2.2e-11	2.15e-05	-4.27	1.45	-2.46	1.81	0.364	0.288
ced-4	P30429	2.16e-06	5.39e-07	-2.46	2.77	-0.658	1.81	-0.96	-0.188
mdt-22	Q23679	2.38e-07	0.000492814	-3.91	1.93	-2.11	1.8	-0.125	0.43
cpb-3	O01835	8.75e-10	0.00150385	-4.34	1.22	-2.55	1.79	0.575	0.179
eif-3.j	Q9XWP7	7.48e-11	8.82e-07	-4	1.96	-2.22	1.78	-0.18	0.63
rad-50	A5JYU5	5.48e-09	9.72e-09	-3.31	3.17	-1.53	1.78	-1.39	1.13
mog-4	O45244	4.04e-12	2.02e-05	-5.23	1.58	-3.46	1.77	0.191	1.5
T21B10.3	Q22624	2.57e-12	1.54e-07	-3.91	1.73	-2.14	1.77	0.0387	0.333
mdt-28	A8WHP8	8.17e-06	0.0022295	-3.21	1.77	-1.44	1.77	-0.000949	-0.327
tiar-2	Q9U2F5	2.22e-07	2.12e-07	-2.48	2.49	-0.71	1.77	-0.719	-0.34
T23G7.3	Q22705	2.21e-08	1.93e-07	-3.3	2.78	-1.54	1.76	-1.02	0.792
hum-2	Q95ZU1	2.44e-06	3.07e-06	-2.54	2.49	-0.782	1.76	-0.733	-0.244
nfx-1	Q18034	6.36e-06	2.53e-05	-2.49	2.19	-0.739	1.75	-0.445	-0.563
dcr-1	P34529	2.32e-10	0.000131768	-4.3	1.44	-2.56	1.74	0.294	0.529
B0001.7	Q17416	3.61e-12	4.31e-07	-3.98	1.66	-2.24	1.74	0.0798	0.419
T27E9.2	O45864	0.000174882	0.000259033	-3.18	3.05	-1.44	1.74	-1.3	0.998
hmg-3	O01683	9.56e-11	3.66e-07	-3.79	2.03	-2.06	1.73	-0.294	0.618
nucl-1	O45181	4.31e-12	6.16e-05	-5.28	1.44	-3.55	1.73	0.292	1.53
F25H8.2	Q19788	4.28e-13	1.15e-05	-4.75	1.29	-3.02	1.73	0.446	0.838
itsn-1	A0A0K3AS36	3.33e-11	0.000292576	-4.62	1.24	-2.9	1.72	0.48	0.7
2023-09-01	G5ED39	1.88e-08	1.18e-07	-3.1	2.68	-1.38	1.72	-0.963	0.617
timm-23	Q9XVQ2	1.04e-05	0.0425296	-4.28	1.45	-2.56	1.72	0.27	0.575
him-10	Q21952	4.75e-10	0.000515633	-4.43	1.35	-2.72	1.71	0.355	0.661
spdl-1	Q17695	3.81e-10	5.05e-09	-3.53	2.91	-1.82	1.71	-1.2	1.32
ZK353.9	Q95ZI6	1.31e-08	1.02e-08	-2.36	2.4	-0.648	1.71	-0.693	-0.37
eif-6	O62106	9.62e-06	4.38e-06	-3.08	3.31	-1.38	1.7	-1.61	1.29
rde-4	G5EBF5	2.13e-13	5.06e-07	-4.31	1.45	-2.61	1.7	0.244	0.672
met-2	P34544	1.11e-07	0.00223244	-3.31	1.27	-1.61	1.7	0.424	-0.511
ndc-80	Q17635	6.45e-05	0.00339456	-3.1	1.96	-1.4	1.69	-0.261	-0.0332
rmo-1	Q93511	0.0071782	3.84e-05	-2	3.72	-0.308	1.69	-2.03	0.649
smg-4	Q20445	1.53e-08	4.87e-07	-2.67	2.03	-0.975	1.69	-0.339	-0.379
snr-4	Q18786	4.28e-09	6.71e-05	-3.83	1.71	-2.14	1.69	-0.0228	0.48
wago-1	Q21770	3.95e-13	1.33e-07	-3.81	1.5	-2.14	1.68	0.182	0.278
dnc-3	Q965K5	2.4e-10	4.46e-05	-3.92	1.47	-2.26	1.67	0.196	0.39
pid-4	O44749	3.28e-08	3.15e-07	-3.44	2.88	-1.77	1.67	-1.21	1.3
his-24	P10771	1.37e-05	0.000178915	-2.75	2.14	-1.08	1.67	-0.466	-0.133
mdt-6	Q9N337	2.98e-07	0.00253392	-3.95	1.62	-2.28	1.67	0.0545	0.552
C55C3.4	Q18865	6.02e-09	0.00016659	-3.92	1.64	-2.25	1.67	0.0379	0.534
rpl-11.2	Q19162	1.69e-12	0.000188994	-4.79	1.09	-3.13	1.66	0.568	0.91
T20D3.6	O01257	3.1e-06	4.08e-05	-2.76	2.18	-1.11	1.65	-0.538	0.00521
disl-2	Q09568	3.45e-10	4.9e-05	-3.91	1.49	-2.27	1.64	0.144	0.491
C27C12.3	G5EEW4	3.35e-08	2.73e-07	-2.63	2.23	-0.99	1.64	-0.588	-0.0644
ddx-27	Q95XM9	2.19e-08	1.52e-06	-3.17	2.26	-1.54	1.63	-0.628	0.538
sptl-3	Q9XVI6	0.000658076	0.0011672	-2.64	2.46	-1.02	1.62	-0.843	0.243
txl-1	G5EES9	2.33e-06	0.00235609	-4.19	2.05	-2.57	1.61	-0.439	1.4
ZK512.2	P34640	1.46e-07	1.63e-06	-2.68	2.2	-1.07	1.61	-0.59	0.0525
C29G2.6	O16887	6.83e-07	2.62e-06	-2.25	2.01	-0.651	1.6	-0.41	-0.537
C24H11.5	A7LPI7	1.48e-07	7.19e-08	-2.41	2.55	-0.815	1.59	-0.957	0.178
cey-4	G5EDV3	7.04e-12	7.82e-09	-3	1.8	-1.41	1.59	-0.207	0.0289
edc-3	Q21740	3.17e-10	1.4e-09	-2.34	2.1	-0.747	1.59	-0.504	-0.343
mix-1	Q09591	4.18e-11	1.02e-05	-4.08	1.55	-2.48	1.59	0.0467	0.841
Y71H2AM.1	Q9BL28	4.08e-06	2.51e-05	-3.04	2.58	-1.46	1.59	-0.995	0.864
dnj-25	D7SFQ6	1.81e-07	1.13e-06	-2.39	2.05	-0.792	1.59	-0.46	-0.342
ima-3	Q19969	5.28e-10	1.66e-06	-3.19	1.71	-1.61	1.59	-0.119	0.136
ife-1	O45551	7.42e-12	8.19e-10	-3.55	2.52	-1.97	1.58	-0.942	1.33
kbp-4	Q9N2X3	8.34e-08	2.25e-07	-2.35	2.17	-0.773	1.58	-0.595	-0.211
M01E5.4	O45690	4.67e-08	8.44e-07	-2.45	1.95	-0.878	1.58	-0.37	-0.328
Y110A7A.15	H2KZ41	2.17e-12	0.000233274	-5.53	1.25	-3.96	1.57	0.318	2.07
ubr-4	O01808	5.64e-05	0.0011325	-2.39	1.72	-0.82	1.57	-0.152	-0.601
rrf-3	G5EE53	4.99e-05	0.0011643	-2.48	1.76	-0.915	1.56	-0.196	-0.451
nasp-2	O17687	2.63e-08	3.88e-05	-3.04	1.64	-1.49	1.55	-0.0932	0.0338
pptr-2	Q17948	1.06e-07	8.08e-07	-2.33	1.98	-0.783	1.55	-0.431	-0.333
cdap-2	Q6A573	0.000113078	0.0179241	-3.16	1.61	-1.62	1.55	-0.066	0.135
zyg-9	G5EEM5	7.37e-05	0.00251446	-2.86	1.91	-1.31	1.55	-0.357	0.116
syp-4	Q9N5K3	8.84e-09	5.14e-08	-2.71	2.37	-1.17	1.54	-0.828	0.459
T28D6.6	G5EGL2	2.71e-05	0.00853639	-3.23	1.63	-1.69	1.54	-0.0874	0.23
pot-2	O45595	3.08e-06	0.000460654	-3.06	1.88	-1.54	1.53	-0.354	0.362
hpo-29	Q8WTL6	2.97e-07	0.0029115	-3.52	1.42	-2	1.52	0.106	0.376
pole-1	O62218	2.78e-06	5e-06	-2.49	2.37	-0.978	1.52	-0.854	0.316
hil-4	O17536	3.07e-10	0.000279004	-3.78	1.2	-2.28	1.51	0.307	0.467
C17H12.12	O45084	4.28e-08	1.55e-06	-2.7	2.02	-1.2	1.5	-0.525	0.232
znf-598	Q18782	4.71e-08	1.72e-06	-2.75	2.05	-1.24	1.5	-0.55	0.288
C53H9.2	O01826	1.18e-10	3.99e-06	-3.32	1.48	-1.84	1.49	0.01	0.339
pro-1	Q22006	1.3e-06	0.000338734	-2.73	1.61	-1.24	1.49	-0.125	-0.121
xpg-1	O44737	0.0001316	0.000138763	-2.42	2.41	-0.926	1.49	-0.913	0.345
eftu-2	Q23463	1.46e-11	2.58e-07	-3.36	1.61	-1.87	1.48	-0.131	0.523
thoc-5	H2L0N5	7.17e-10	0.00012341	-3.6	1.32	-2.12	1.48	0.159	0.477
npp-6	P91350	2.92e-10	0.00583	-4.72	1.01	-3.25	1.48	0.464	1.31
hrpk-1	P91277	1.68e-09	1.34e-07	-2.23	1.6	-0.749	1.48	-0.114	-0.621
eel-1	Q9GUP2	1.02e-05	0.000116499	-2.42	1.92	-0.934	1.48	-0.432	-0.119
F36D4.5	H2KZK4	1.07e-07	4.07e-05	-2.91	1.75	-1.43	1.48	-0.266	0.217
gld-1	Q17339	3.65e-10	4.57e-08	-2.25	1.56	-0.772	1.47	-0.0882	-0.614
ztf-7	Q20448	1.75e-07	0.00268382	-2.74	1.07	-1.26	1.47	0.407	-0.615
arp-11	Q9GYR2	1.02e-09	0.0011961	-3.53	1.03	-2.07	1.46	0.432	0.173
cogc-2	Q21444	0.000148676	0.00729388	-2.57	1.58	-1.12	1.46	-0.121	-0.219
nemp-1	Q19293	4.23e-05	2.11e-05	-2	2.13	-0.538	1.46	-0.675	-0.246
byn-1	Q20932	3.82e-07	2.22e-06	-2.32	2.01	-0.871	1.45	-0.555	-0.0246
R10E4.1	Q21899	2.08e-07	1.43e-06	-2.24	1.91	-0.793	1.45	-0.466	-0.187
C14B9.8	A0A2K5ATT8	2.14e-09	2.76e-05	-2.9	1.34	-1.46	1.44	0.101	-0.0817
nap-1	Q19007	1.54e-11	6.64e-10	-2.46	1.87	-1.03	1.43	-0.447	0.0544
ced-2	Q9NHC3	1.58e-07	1.78e-06	-2.34	1.92	-0.912	1.43	-0.49	-0.0291
sftb-1	G5EEQ8	6.91e-06	0.00132265	-2.86	1.66	-1.43	1.43	-0.229	0.223
nud-1	G5EE74	2.96e-05	0.00622269	-3.45	1.85	-2.02	1.43	-0.422	1.02
C24H12.4	O17157	3.11e-05	0.00303783	-2.35	1.4	-0.922	1.43	0.0232	-0.529
syf-1	P91175	1.3e-06	0.0156408	-3.48	1.21	-2.05	1.43	0.224	0.39
prp-19	Q10051	1.86e-09	0.00615586	-4.12	1	-2.72	1.41	0.401	0.912
smc-4	Q20060	6.06e-13	2.16e-06	-3.91	1.26	-2.51	1.4	0.142	0.97
air-2	O01427	4.18e-07	5.12e-06	-2.25	1.82	-0.855	1.4	-0.426	-0.114
tat-5	G5EGE0	3.56e-06	7.41e-07	-1.97	2.25	-0.572	1.4	-0.851	0.0239
cpsf-3	Q95PY8	2.83e-05	5.07e-06	-2.01	2.35	-0.622	1.39	-0.963	0.196
rpl-20	O44480	2.16e-10	1.33e-08	-2.3	1.69	-0.923	1.38	-0.315	-0.141
mrt-1	Q8T3E0	2.34e-05	0.00123287	-2.76	1.81	-1.38	1.38	-0.43	0.431
ints-3	W6RQY9	0.000344817	0.00076865	-2.26	2.06	-0.878	1.38	-0.679	0.174
H05L14.2	A0A1T5HUI7	1.72e-07	0.00369769	-4.91	1.82	-3.54	1.37	-0.453	2.62
rps-9	Q20228	5.81e-10	1.36e-08	-2.25	1.78	-0.893	1.36	-0.42	-0.0456
C43E11.9	P91154	7.02e-05	0.00408644	-2.5	1.55	-1.14	1.36	-0.187	-0.04
C33F10.12	Q18390	3.59e-06	3.8e-07	-2	2.42	-0.652	1.35	-1.07	0.368
cul-2	Q17390	9.93e-09	0.00113326	-3.12	1.09	-1.77	1.35	0.261	0.163
ddx-17	Q9XUW5	0.0036966	0.0308176	-2.29	1.59	-0.947	1.35	-0.241	-0.158
lin-5	P45970	3.03e-08	0.000601739	-3.5	1.43	-2.15	1.35	-0.0857	0.89
nuo-3	O18236	0.00388958	0.031869	-1.97	1.37	-0.621	1.35	-0.0141	-0.716
Y42H9AR.1	Q9N3Y1	0.000437428	0.00386774	-2.19	1.66	-0.844	1.35	-0.315	-0.189
rpl-6	P47991	5.42e-10	2.56e-08	-2.25	1.69	-0.908	1.35	-0.341	-0.0983
dhs-22	Q9XVS9	0.00602739	0.0133269	-1.86	1.63	-0.512	1.34	-0.284	-0.549
puf-12	Q09622	1.52e-07	3.17e-05	-2.58	1.63	-1.24	1.34	-0.291	0.19
tim-1	G5EDN3	2.32e-07	2.26e-06	-2.09	1.73	-0.747	1.34	-0.39	-0.201
par-5	P41932	9.43e-11	1.23e-08	-2.83	1.97	-1.49	1.33	-0.638	0.798
clic-1	P90961	1.62e-07	0.00510679	-3.14	1.11	-1.8	1.33	0.228	0.24
F22E5.1	O16719	2.01e-07	9.95e-07	-1.92	1.68	-0.585	1.33	-0.351	-0.397
T23H2.3	P91494	1.4e-09	4.22e-06	-2.84	1.51	-1.52	1.33	-0.181	0.372
C47E12.2	Q18683	9.29e-07	2.62e-05	-2.08	1.55	-0.747	1.33	-0.219	-0.363
rab-11.1	O01803	3.63e-05	3.79e-05	-2.05	2.04	-0.716	1.33	-0.707	0.0883
dnj-20	Q8MPX3	0.00233422	0.0238554	-2.04	1.4	-0.721	1.32	-0.0783	-0.521
his-1	P62784	2.39e-05	9.47e-05	-2.27	1.99	-0.949	1.32	-0.664	0.289
hpo-27	K8ERU3	0.000371398	0.000216209	-1.93	2.05	-0.621	1.31	-0.739	0.0493
rpl-16	Q27389	1.02e-09	1.85e-07	-2.36	1.59	-1.05	1.31	-0.279	0.0234
nxf-1	B5BM32	1.61e-10	0.00405071	-4.91	1.06	-3.61	1.3	0.236	2.07
rpl-7	O01802	6.27e-11	1.73e-09	-2.12	1.66	-0.823	1.3	-0.366	-0.107
alh-4	Q8MXJ7	9.17e-08	1.62e-08	-1.78	2.04	-0.476	1.3	-0.732	-0.0954
Y18D10A.11	Q9XW20	1.97e-07	2.69e-06	-2.01	1.62	-0.711	1.3	-0.32	-0.271
rbbp-5	Q09309	2e-05	2.98e-05	-2.32	2.23	-1.01	1.3	-0.928	0.636
Y48G8AL.13	W6RR25	3.87e-07	0.00502644	-2.64	1	-1.34	1.3	0.294	-0.246
Y104H12D.2	Q9N5A2	2.1e-08	2.01e-05	-2.55	1.44	-1.26	1.29	-0.15	0.119
Y51A2D.18	Q9XXQ4	2.88e-07	5.19e-06	-1.91	1.5	-0.618	1.29	-0.208	-0.463
F54E12.2	G5EEW5	1.89e-09	0.000116115	-3.28	1.31	-2	1.28	-0.0249	0.749
dpl-1	Q22703	1.1e-06	0.00308559	-2.73	1.21	-1.45	1.28	0.0693	0.0995
eif-3.E	O61820	0.00126691	0.0110146	-2.29	1.67	-1.01	1.28	-0.392	0.121
C17G1.2	Q93240	1.92e-06	0.000660838	-2.83	1.6	-1.56	1.27	-0.333	0.625
F25H2.4	Q93568	1.92e-05	4.4e-05	-2.29	2.12	-1.04	1.25	-0.867	0.654
rps-4	Q9N3X2	2.19e-11	2.28e-09	-2.14	1.53	-0.904	1.24	-0.288	-0.048
copz-1	O17901	1.03e-06	0.012171	-3.1	1.11	-1.87	1.24	0.13	0.501
gld-2	O17087	9.62e-09	6.71e-05	-2.27	1.08	-1.03	1.24	0.164	-0.376
stim-1	G5EF60	3.48e-05	9.26e-06	-1.57	1.77	-0.333	1.24	-0.537	-0.366
F08D12.1	P91240	1.09e-08	0.000313419	-2.57	1.05	-1.34	1.23	0.181	-0.0693
Y71F9AL.9	Q9N4I3	4.16e-09	7.56e-08	-2.01	1.61	-0.782	1.23	-0.381	-0.0667
rpl-15	P91374	4.75e-09	3.83e-08	-2	1.71	-0.773	1.23	-0.479	0.0235
W06B4.1		7.81e-05	0.0365942	-3.01	1.28	-1.79	1.22	-0.0523	0.615
Y57A10A.27		0.000404893	0.0277736	-2.56	1.37	-1.34	1.22	-0.154	0.277
rnp-8	O61711	2.73e-08	4.16e-05	-2.26	1.22	-1.04	1.22	0.00285	-0.183
Y39B6A.33	Q9NEU5	9.16e-07	0.000386615	-2.58	1.46	-1.35	1.22	-0.233	0.362
cgh-1	Q95YF3	2.08e-09	6.22e-09	-1.7	1.56	-0.491	1.21	-0.357	-0.361
chp-1	G5EEI8	0.0013394	0.0151559	-2.2	1.53	-0.996	1.21	-0.325	0.116
rpl-5	P49405	2.03e-08	1.62e-07	-1.85	1.58	-0.644	1.21	-0.366	-0.199
sqd-1	Q8MXR6	4.32e-09	3.01e-06	-1.99	1.18	-0.782	1.21	0.0252	-0.45
taf-1	G5EGM3	3.77e-05	9.32e-06	-1.54	1.75	-0.326	1.21	-0.54	-0.347
ant-1.4	G5EFU2	4.5e-05	0.00111411	-2.32	1.64	-1.12	1.2	-0.439	0.358
Y49E10.21	E1B6W2	1.54e-07	0.002586	-2.72	1.05	-1.52	1.2	0.148	0.168
mex-6	Q09436	5.79e-06	1.21e-05	-2.09	1.96	-0.887	1.2	-0.754	0.439
ssb-1	O01806	1.46e-09	1.09e-07	-2.12	1.53	-0.92	1.2	-0.326	0.0464
bub-1	Q21776	3.05e-10	1.61e-06	-2.59	1.34	-1.41	1.19	-0.151	0.373
Y48B6A.1	Q9U2A9	2.32e-06	1.67e-05	-2.33	1.96	-1.14	1.19	-0.765	0.709
B0495.7	Q09216	1.43e-05	0.0355142	-3.74	1.36	-2.55	1.19	-0.167	1.53
W09C5.1	G5EFH0	1.2e-06	5.19e-05	-2.12	1.51	-0.924	1.19	-0.317	0.049
lpd-7	Q95Y89	0.00675809	0.0053718	-1.96	2.03	-0.773	1.19	-0.844	0.428
nkb-1	Q93235	0.000171374	0.000515036	-1.84	1.63	-0.647	1.19	-0.437	-0.109
pno-1	O18216	5.11e-05	0.00805893	-2.21	1.2	-1.02	1.19	-0.00642	-0.165
K12H4.3	P34524	9.1e-07	0.000342552	-2.5	1.43	-1.32	1.18	-0.255	0.401
sas-5	Q20010	1.72e-06	0.000435808	-2.47	1.45	-1.29	1.18	-0.271	0.378
C30C11.4	Q05036	2.88e-07	0.000752787	-3.24	1.54	-2.06	1.17	-0.369	1.26
eif-3.H	O01974	2.96e-06	0.016159	-3.01	1.11	-1.84	1.17	0.058	0.606
emb-30	P34441	1.89e-07	0.00419694	-2.76	1.02	-1.59	1.17	0.153	0.273
inft-2	Q19479	1.24e-07	7.57e-05	-2.23	1.27	-1.06	1.17	-0.103	-0.00947
pptr-1	O18178	9.83e-06	0.00015358	-1.79	1.37	-0.617	1.17	-0.2	-0.353
F13H8.2	Q19433	0.000145864	0.00547253	-2.45	1.57	-1.29	1.17	-0.402	0.52
rps-13	P51404	4.91e-09	2.5e-06	-2.18	1.33	-1.01	1.17	-0.155	-0.00979
rps-7	Q23312	4.52e-10	1.49e-08	-1.96	1.51	-0.808	1.16	-0.357	0.00953
cec-6	Q22430	4.83e-05	0.000239256	-1.83	1.55	-0.661	1.16	-0.386	-0.117
lin-45	V6CKR7	1.38e-07	0.00239399	-2.58	1	-1.42	1.16	0.16	0.0977
R08D7.2	P30641	1.13e-05	0.00481147	-2.36	1.2	-1.21	1.15	-0.0508	0.109
app-1	O44750	1.49e-06	5.7e-07	-1.93	2.09	-0.787	1.14	-0.947	0.594
klp-17	Q5FC71	2.6e-08	1.91e-07	-1.89	1.62	-0.753	1.14	-0.48	0.0929
T05H10.1		1.35e-08	0.000242333	-2.52	1.08	-1.38	1.14	0.0665	0.173
F44E5.1		4.32e-07	8.54e-08	-1.48	1.69	-0.337	1.14	-0.542	-0.263
hcp-2	Q22257	7.24e-07	0.00134184	-2.78	1.33	-1.65	1.13	-0.2	0.718
rpl-18	O45946	1.28e-09	5.62e-09	-1.78	1.59	-0.659	1.12	-0.473	0.0137
F55F8.2	P91340	6.35e-05	0.000208268	-1.83	1.62	-0.717	1.12	-0.507	0.109
Y82E9BR.18	Q9BKR5	0.000212427	0.00016944	-1.5	1.54	-0.389	1.12	-0.425	-0.302
rpl-10	Q09533	1.56e-09	1.28e-07	-1.94	1.39	-0.818	1.12	-0.264	-0.0389
rpl-33	P49180	1.04e-07	6.82e-07	-1.72	1.48	-0.602	1.12	-0.361	-0.152
rps-26	O45499	2.07e-08	3.17e-07	-1.84	1.48	-0.723	1.12	-0.368	-0.0246
rpl-27	P91914	8.19e-10	7.63e-09	-1.77	1.5	-0.666	1.11	-0.394	-0.0465
F55C5.8	Q20822	6.14e-10	1.45e-07	-1.99	1.31	-0.882	1.11	-0.206	-0.0195
rpl-26	Q19869	2.64e-09	1.46e-07	-1.9	1.4	-0.794	1.11	-0.29	-0.0216
rpl-4	O02056	3.78e-10	2.52e-08	-1.92	1.4	-0.808	1.11	-0.29	-0.0122
rps-2	P51403	5e-10	4.58e-08	-1.93	1.37	-0.815	1.11	-0.259	-0.0378
isy-1	Q20716	2.03e-07	3.84e-07	-2.02	1.92	-0.915	1.1	-0.814	0.625
isw-1	P41877	2.87e-08	6.44e-06	-2.04	1.31	-0.942	1.1	-0.21	0.0518
C06A6.4	Q17686	0.000712208	0.00111424	-1.54	1.46	-0.439	1.1	-0.358	-0.305
F56F11.4	Q9TZ65	1.68e-05	0.00703235	-2.84	1.41	-1.74	1.1	-0.319	0.966
rps-8	P48156	5.61e-09	2.57e-07	-1.81	1.35	-0.711	1.1	-0.245	-0.148
F42A10.5	Q20310	2.15e-06	0.00023707	-2.01	1.29	-0.923	1.09	-0.2	0.0324
rpl-25.2	Q20647	1.41e-08	4.1e-06	-1.87	1.18	-0.78	1.09	-0.0939	-0.212
rpl-8	Q9XVF7	4.47e-09	7.27e-08	-1.85	1.49	-0.755	1.09	-0.4	0.0638
F55F10.1	L8E6W9	0.000139391	0.00220673	-1.72	1.25	-0.641	1.08	-0.166	-0.276
pos-1	G5EF15	2.44e-05	4.21e-05	-1.72	1.63	-0.637	1.08	-0.55	0.105
rpl-10a	Q9N4I4	1.04e-10	2.61e-08	-1.91	1.26	-0.828	1.08	-0.186	-0.0641
rpl-14	Q9XVE9	1e-07	4.94e-07	-1.7	1.5	-0.627	1.08	-0.423	-0.0258
rpl-19	O02639	2.71e-07	4.42e-07	-1.6	1.54	-0.522	1.08	-0.46	-0.097
rpl-25.1	P48162	1.06e-07	1.36e-06	-1.71	1.39	-0.632	1.08	-0.312	-0.134
rpl-36	P49181	7.76e-10	8.43e-08	-1.95	1.37	-0.87	1.08	-0.286	0.0761
tofu-7	Q23486	0.00474978	0.0181117	-1.95	1.56	-0.87	1.08	-0.48	0.275
ima-2	P91276	8.18e-08	1.69e-06	-1.82	1.43	-0.753	1.07	-0.355	0.0384
C18E9.2	Q18093	5.63e-05	0.00293444	-2.11	1.34	-1.04	1.07	-0.276	0.253
rpl-3	P50880	6.21e-10	7.09e-08	-1.91	1.33	-0.837	1.07	-0.263	0.0293
rpl-7A	Q966C6	1.38e-09	6.75e-08	-1.82	1.35	-0.75	1.07	-0.284	-0.0375
knl-3	O76406	0.00017344	0.0156082	-1.87	1.02	-0.802	1.06	0.043	-0.305
rpl-22	P52819	7.97e-09	1.07e-06	-1.93	1.31	-0.861	1.06	-0.243	0.0392
rpl-28	Q21930	6.82e-07	2.76e-06	-1.52	1.35	-0.46	1.06	-0.292	-0.304
znfx-1	E9P860	1.52e-12	2.5e-13	-4.12	4.68	-3.07	1.05	-3.63	5.65
let-418	G5EBZ4	2.58e-07	0.000133346	-2.21	1.26	-1.15	1.05	-0.208	0.307
thoc-7	Q9U3S3	1.5e-05	0.00112892	-1.76	1.12	-0.71	1.05	-0.0696	-0.268
sas-4	P34402	3.77e-05	0.000428311	-2.01	1.57	-0.969	1.05	-0.52	0.443
bub-3	Q9XWH0	2.2e-09	1.45e-05	-2.37	1.16	-1.33	1.04	-0.128	0.425
elpc-1	Q9N595	8.59e-07	0.000244306	-2.17	1.29	-1.13	1.04	-0.248	0.345
emb-27	G5EG38	1.33e-05	0.0292338	-2.67	1.01	-1.64	1.04	0.0297	0.573
erfa-1	O16520	1.15e-07	2.07e-05	-1.95	1.25	-0.9	1.04	-0.207	0.0628
dscc-1	O44992	0.000108359	0.000237317	-1.41	1.3	-0.366	1.04	-0.255	-0.423
rps-25	P52821	1.9e-08	8.3e-07	-1.81	1.34	-0.765	1.04	-0.297	0.0195
F27D4.4	Q93618	1.21e-05	0.00125062	-2.06	1.27	-1.03	1.03	-0.24	0.243
rpl-35	P34662	4.93e-09	2.29e-07	-1.69	1.26	-0.663	1.03	-0.228	-0.137
rpl-41	P48166	5.04e-06	7.52e-06	-1.48	1.43	-0.451	1.03	-0.4	-0.179
rps-1	P48154	2.72e-09	3.12e-07	-1.76	1.22	-0.726	1.03	-0.186	-0.121
vbh-1	Q95XY1	2.6e-08	1.94e-06	-1.55	1.1	-0.523	1.03	-0.0674	-0.44
maph-1.2	A9UJN7	6.33e-07	1.19e-05	-1.63	1.27	-0.605	1.02	-0.242	-0.177
egg-5	O61789	0.000125693	0.00231462	-2.29	1.63	-1.27	1.02	-0.612	0.863
asps-1	Q17425	1.76e-05	0.00218057	-2.1	1.25	-1.08	1.02	-0.223	0.279
sptl-2	Q20375	2.49e-06	2.86e-06	-1.48	1.46	-0.453	1.02	-0.435	-0.135
dpf-3	Q965K3	1.09e-06	1.15e-05	-1.67	1.36	-0.662	1.01	-0.354	0.00833
F25G6.9	O16928	0.000116406	0.000626918	-1.52	1.27	-0.514	1.01	-0.258	-0.237
Y53C12B.1	O18215	0.000254424	0.00586065	-2.21	1.48	-1.2	1.01	-0.477	0.673
rpl-32.1	Q22716	6.42e-08	5.36e-07	-1.54	1.3	-0.535	1.01	-0.294	-0.18
Y61A9LA.10	Q9N306	0.000341387	0.000189084	-1.42	1.51	-0.418	1	-0.512	-0.0701
rps-15	Q9XVP0	3.02e-09	1.17e-07	-1.7	1.28	-0.695	1	-0.279	-0.028
Q19520	Q19520	1.21e-06	9.17e-06	-1.85	1.55	-0.853	0.999	-0.555	0.409
plk-3	Q20845	3.2e-10	3.82e-05	-3.34	1.3	-2.34	0.998	-0.302	1.65
Y37E3.8	Q9BKU5	6.77e-09	6.24e-07	-1.72	1.21	-0.722	0.997	-0.209	-0.0652
K07C5.4	Q21276	7.75e-07	0.000856255	-2.05	1.04	-1.05	0.996	-0.0465	0.104
rpl-13	P91128	4.45e-09	1.91e-06	-1.84	1.14	-0.846	0.996	-0.144	-0.00662
istr-1	G5ECX8	4.17e-05	1.61e-05	-1.41	1.54	-0.419	0.987	-0.551	-0.0172
Y39A3CL.1	Q9N412	1.32e-06	1.91e-05	-2.11	1.67	-1.12	0.985	-0.683	0.822
lmn-1	Q21443	0.00538908	0.000849453	-1.39	1.78	-0.403	0.985	-0.793	0.212
rpl-34	A3QMC5	2.29e-08	3.24e-06	-1.76	1.18	-0.776	0.984	-0.195	-0.0128
rps-24	Q1XFY9	4.42e-06	7.58e-05	-1.62	1.24	-0.633	0.982	-0.258	-0.0912
toca-2	Q9XUS7	0.000230894	0.000362238	-1.94	1.85	-0.974	0.97	-0.88	0.884
F54B3.1	A5Z2S3	0.00357226	0.037156	-2.08	1.37	-1.11	0.97	-0.402	0.539
ngp-1	Q9U365	1.69e-06	0.000250101	-1.93	1.21	-0.964	0.969	-0.239	0.234
F19B10.10	O02075	0.000232345	0.00116445	-1.6	1.33	-0.631	0.966	-0.36	0.0254
ife-3	O61955	1.98e-06	1.09e-05	-1.39	1.2	-0.432	0.963	-0.238	-0.294
csn-1	Q9GS00	0.000105198	0.0238852	-2.38	1.14	-1.42	0.959	-0.181	0.644
arx-5	Q9XWV3	0.000837976	0.0266942	-1.72	1.01	-0.762	0.955	-0.0547	-0.138
F09E5.11	Q19259	3.05e-05	0.0292971	-2.59	1.05	-1.63	0.952	-0.0983	0.78
rps-6	Q9NEN6	1.21e-08	9.09e-07	-1.59	1.13	-0.65	0.944	-0.188	-0.106
car-1	Q9XW17	1.82e-06	1.33e-06	-1.18	1.21	-0.244	0.94	-0.275	-0.421
rps-22	O17218	1.68e-07	6e-07	-1.39	1.25	-0.452	0.938	-0.317	-0.169
hrs-1	P34183	0.00255919	0.00206516	-1.3	1.34	-0.368	0.937	-0.406	-0.162
kin-19	P42168	9.99e-08	0.000164637	-2.17	1.13	-1.23	0.937	-0.189	0.485
M116.5	Q965L0	4.22e-07	0.000173009	-2.03	1.17	-1.09	0.936	-0.239	0.396
T05F1.2	Q9XUR4	4.48e-08	3.85e-05	-1.98	1.12	-1.05	0.934	-0.182	0.295
rps-23	Q19877	3e-09	2.8e-07	-1.62	1.14	-0.69	0.932	-0.21	-0.0321
T22D1.5	Q9GZH6	4.55e-05	0.000332267	-1.66	1.36	-0.736	0.929	-0.428	0.235
Y41D4B.11	Q95Y11	1.32e-05	5.01e-05	-1.43	1.26	-0.508	0.926	-0.338	-0.0798
rpl-23	P48158	9.5e-09	1.8e-07	-1.54	1.23	-0.616	0.924	-0.301	-0.00706
csn-3	Q9N425	4.02e-09	4.92e-06	-1.88	1.06	-0.953	0.923	-0.139	0.17
gop-2	P46577	0.00181449	0.00247127	-1.55	1.49	-0.634	0.916	-0.571	0.289
rpl-17	Q9BL19	2.63e-08	9.59e-06	-1.67	1.03	-0.759	0.914	-0.116	-0.0391
glo-4	Q5DX34	8.72e-05	1.91e-05	-1.55	1.79	-0.64	0.91	-0.884	0.614
rpl-11.1	Q94300	6.58e-08	1.14e-06	-1.49	1.18	-0.579	0.908	-0.274	-0.0547
K02A11.3	Q21109	0.00436287	0.015658	-1.63	1.32	-0.725	0.904	-0.418	0.239
pmp-2	Q18598	1.46e-05	8.98e-06	-1.24	1.29	-0.336	0.903	-0.392	-0.175
O62477	O62477	0.000215602	0.00433179	-1.98	1.37	-1.08	0.902	-0.465	0.642
rpl-24.1	O01868	0.000170174	9.15e-05	-1.1	1.17	-0.199	0.898	-0.271	-0.428
aak-1	P45894	4.81e-05	0.00530368	-1.84	1.06	-0.946	0.895	-0.163	0.214
pmp-1	Q18597	1.46e-05	7.51e-06	-1.2	1.28	-0.308	0.895	-0.383	-0.203
ZC262.2	P34594	0.000984115	0.00164974	-1.32	1.24	-0.427	0.895	-0.344	-0.125
K04C2.2	Q21210	8.81e-06	0.000121513	-1.4	1.09	-0.514	0.886	-0.204	-0.168
acdh-13	H2KYN3	0.00150979	0.00184375	-1.36	1.32	-0.48	0.877	-0.446	0.0497
nmad-1	Q8MNT9	7.41e-06	1.15e-05	-1.34	1.28	-0.46	0.875	-0.409	-0.0062
gtsf-1	A3QMD6	0.000818872	0.00976384	-1.5	1.06	-0.63	0.872	-0.19	-0.053
smc-5	Q18237	0.000255119	0.00016919	-1.25	1.3	-0.376	0.872	-0.432	-0.0644
eif-3.K	Q9XUP3	0.000261238	0.0133647	-1.72	1.01	-0.849	0.867	-0.142	0.123
zwl-1	Q95XP9	2.62e-07	2.3e-06	-1.45	1.21	-0.588	0.866	-0.349	0.0703
let-49	Q95Q17	9.97e-05	0.000362879	-1.26	1.1	-0.398	0.862	-0.236	-0.227
ubl-1	P37165	2.95e-07	1.49e-05	-1.44	1.03	-0.576	0.861	-0.167	-0.117
rpl-31	Q9U332	1.63e-07	7e-06	-1.46	1.07	-0.604	0.859	-0.209	-0.047
B0001.3	A0A061ACH8	5.77e-06	7.49e-07	-2.23	2.66	-1.38	0.851	-1.81	2.34
clec-4	Q9NAK5	0.00445826	0.0475421	-1.98	1.27	-1.13	0.845	-0.427	0.712
F23D12.2	Q19761	0.00106904	0.00525377	-1.32	1.06	-0.48	0.841	-0.223	-0.137
hasp-1	G5EE25	0.000168118	0.000113508	-1.16	1.21	-0.327	0.835	-0.375	-0.133
rps-16	Q22054	2.27e-07	4.87e-07	-1.18	1.1	-0.351	0.824	-0.281	-0.193
rnf-1	O01482	0.000119979	0.000121041	-1.44	1.44	-0.619	0.82	-0.617	0.416
H06I04.3	Q5CCJ3	2.15e-06	1.14e-05	-1.77	1.53	-0.954	0.819	-0.713	0.847
ant-1.1	O45865	1.03e-07	1.84e-07	-1.19	1.13	-0.369	0.817	-0.316	-0.132
C05C10.7	Q8I4N1	1.39e-07	0.000171377	-1.92	1.02	-1.11	0.813	-0.204	0.496
lotr-1	A5Z2T6	2.79e-11	1.46e-09	-3.12	2.34	-2.31	0.809	-1.53	3.03
sqv-1	X5M5R6	0.0010306	0.0101756	-1.55	1.12	-0.737	0.809	-0.307	0.235
Y46G5A.4	Q9U2G0	0.00022327	0.000604757	-1.27	1.14	-0.466	0.809	-0.332	-0.0113
F10G2.1	Q22957	5.84e-06	0.000313755	-1.54	1.04	-0.733	0.807	-0.237	0.162
F10E9.5	P34399	7.45e-05	0.000170338	-1.13	1.04	-0.327	0.803	-0.235	-0.241
sptl-1	P91079	2.86e-07	1.31e-06	-1.24	1.1	-0.442	0.802	-0.296	-0.0638
Y46E12BL.2	Q965N8	2.37e-07	1.18e-06	-1.24	1.09	-0.44	0.799	-0.287	-0.0717
ran-2	P34342	1.11e-09	9.59e-06	-2.38	1.15	-1.58	0.794	-0.357	1.14
meg-4	Q9TZK8	2.23e-05	4.45e-06	-1.8	2.08	-1.01	0.79	-1.29	1.52
nst-1	Q21086	9.04e-08	1.46e-07	-1.25	1.2	-0.462	0.785	-0.416	0.0924
spg-20	O44735	1.37e-05	1.56e-05	-1.16	1.15	-0.381	0.783	-0.368	-0.0339
tgs-1	A8WHU4	1.98e-07	8.89e-07	-1.21	1.07	-0.429	0.782	-0.289	-0.0641
pqn-85	Q95XZ5	0.00223183	0.00334709	-1.46	1.38	-0.685	0.779	-0.605	0.511
pas-6	O44156	0.00116459	0.0172095	-1.76	1.18	-0.993	0.771	-0.407	0.629
T05B9.1	Q22215	1.36e-06	0.000106153	-1.54	1.03	-0.767	0.771	-0.261	0.256
T20F5.6	P91482	8.4e-05	0.000859929	-1.6	1.24	-0.835	0.768	-0.475	0.542
wago-3/ppw-2	Q9N585	1.13e-07	1.33e-07	-1.2	1.18	-0.433	0.764	-0.418	0.0877
rpl-24.2	Q17606	3.25e-05	0.000735277	-1.4	1.01	-0.641	0.76	-0.249	0.13
let-502	P92199	0.00325226	0.00727057	-1.42	1.26	-0.666	0.759	-0.505	0.412
K01G5.5	O17919	2.28e-06	4.65e-06	-1.09	1.03	-0.336	0.756	-0.27	-0.15
misc-1	P90992	1.04e-05	7.22e-06	-1.03	1.07	-0.303	0.73	-0.337	-0.09
hrpf-1	Q9BIB7	0.000661988	0.000613841	-1.15	1.16	-0.426	0.722	-0.436	0.14
smg-1	O01510	0.00759465	0.00436476	-1.02	1.11	-0.332	0.688	-0.422	0.0662
F01G4.4	I2HAE5	1.54e-06	1.23e-05	-1.65	1.38	-1.01	0.641	-0.737	1.11
Y39A1A.14	Q9XX15	0.020486	0.0128441	-1.01	1.1	-0.398	0.612	-0.49	0.276
rsd-6	Q19491	9.16e-10	5.95e-07	-3.12	1.89	-2.63	0.484	-1.41	3.56
B0238.9	O16485	0.000377743	2.14e-05	-1.18	1.57	-0.846	0.331	-1.24	1.76

## Sheet: Z granules component
Gene_name	Uniprot_ID	WT_vs_TurboID-ZNFX-1_p.val	MUT-16-TurboID_vs_TurboID-ZNFX-1_p.val	WT_vs_TurboID-ZNFX-1_ratio	MUT-16-TurboID_vs_TurboID-ZNFX-1_ratio	WT_centered	PGL-1-TurboID_centered	MUT-16-TurboID_centered	TurboID-ZNFX-1_centered
znfx-1	E9P860	3.4e-17	1.38e-17	-8.72	-9.28	-3.07	1.05	-3.63	5.65
Y111B2A.3	Q9NEM5	2.53e-11	1.52e-11	-7.12	-7.39	-3.16	2.61	-3.42	3.97
hpo-40	Q23647	5.3e-14	5.9e-10	-7.27	-3.73	-3.55	-0.161	-0.0133	3.72
rsd-6	Q19491	6.32e-14	1.45e-12	-6.19	-4.96	-2.63	0.484	-1.41	3.56
glh-4	O76743	1.1e-16	4.92e-12	-9.05	-4.27	-5.59	2.94	-0.809	3.46
iscu-1	O45948	0.00933737	3.73e-05	-2.33	-4.54	0.868	-2.72	-1.34	3.2
B0001.8	Q8WQH2	2.53e-09	4.84e-09	-4.27	-4.07	-1.19	-0.92	-0.983	3.09
lotr-1	A5Z2T6	1.39e-14	1.32e-13	-5.35	-4.56	-2.31	0.809	-1.53	3.03
Y48G10A.2	Q9U284	1.27e-09	8.46e-11	-4.85	-5.91	-1.97	2.13	-3.03	2.88
mip-1	Q18509	2.27e-12	1.03e-10	-6.87	-5.23	-4	3.48	-2.36	2.87
B0001.5	Q17414	4.34e-09	6.73e-09	-3.86	-3.74	-1.08	-0.74	-0.957	2.78
C15C6.2	Q9XVT3	3.97e-07	1.34e-05	-4.34	-3.21	-1.56	-0.786	-0.43	2.78
mip-2	P90898	2.87e-11	6.23e-11	-5.43	-5.13	-2.72	2.42	-2.42	2.71
H05L14.2	A0A1T5HUI7	9.35e-09	3.91e-05	-6.15	-3.07	-3.54	1.37	-0.453	2.62
Y37E11AM.3	U4PBL3	7.02e-06	5.86e-06	-3.49	-3.55	-1.11	-0.107	-1.17	2.38
B0001.3	A0A061ACH8	1.04e-08	2.48e-09	-3.73	-4.15	-1.38	0.851	-1.81	2.34
pgl-1	Q304E5	2.34e-15	1.63e-08	-8.34	-2.69	-6	4	-0.346	2.34
dnj-11	Q94216	4.96e-14	0.000326865	-7.39	-1.23	-5.29	2.33	0.864	2.1
glh-3	O01836	1.47e-08	3.68e-07	-5.2	-4.04	-3.11	2.97	-1.95	2.09
Y110A7A.15	H2KZ41	6.32e-13	7.04e-06	-6.03	-1.76	-3.96	1.57	0.318	2.07
nxf-1	B5BM32	2.12e-11	3.39e-05	-5.69	-1.84	-3.61	1.3	0.236	2.07
ife-4	Q22888	1.85e-09	2.96e-08	-3.22	-2.61	-1.18	-0.29	-0.569	2.04
dyrb-1	Q22752	0.000783864	0.00664547	-3.05	-2.28	-1.06	-0.624	-0.296	1.98
rde-12	P90897	6.66e-10	1.09e-08	-4.96	-4.03	-3.02	3.16	-2.09	1.94
nxt-1	G8JYG1	1.11e-11	0.000139782	-5.41	-1.45	-3.48	1.09	0.473	1.92
prg-1	P90786	6.6e-09	3.79e-06	-5.19	-3.12	-3.28	2.57	-1.21	1.92
npp-9	Q86G90	2.1e-12	7.65e-06	-4.92	-1.55	-3.06	0.891	0.311	1.86
klp-18	G5EBX0	2.06e-05	0.00729248	-5.17	-2.61	-3.32	2.24	-0.764	1.84
ani-3	Q9XWN6	2e-10	1.24e-05	-3.65	-1.52	-1.84	-0.255	0.285	1.81
sss-1	Q9XVP7	3.49e-06	3.13e-06	-2.39	-2.42	-0.611	-0.538	-0.634	1.78
pid-5	Q9GUI6	1.89e-10	1.41e-08	-4.84	-3.51	-3.07	3.05	-1.74	1.77
B0238.9	O16485	5.38e-08	8.46e-09	-2.61	-3	-0.846	0.331	-1.24	1.76
pid-2/zsp-1	Q9N3P1	2.18e-07	9.73e-06	-4.11	-2.98	-2.39	1.93	-1.26	1.72
F55A12.5	O01756	2.12e-11	6.82e-05	-4.57	-1.38	-2.88	0.87	0.313	1.69
arf-6	Q9U2S4	4.63e-05	0.00123444	-2.61	-1.82	-0.937	-0.583	-0.152	1.67
plk-3	Q20845	2.77e-11	3.74e-07	-3.99	-1.95	-2.34	0.998	-0.302	1.65
C18H9.3/C18H9.2	Q09237	1.72e-10	2.18e-08	-3.05	-2.13	-1.41	0.248	-0.483	1.64
cls-2	K8ESK4	0.00732294	0.00540435	-2.58	-2.71	-0.945	0.38	-1.07	1.64
D2005.4	Q93410	4.85e-13	5.96e-07	-6.32	-2.23	-4.73	3.78	-0.639	1.59
pgl-2	P34266	1.24e-12	3.02e-08	-6.12	-2.92	-4.54	4.31	-1.35	1.58
Y57A10A.31	Q9NA71	9.66e-09	6.48e-10	-3.22	-3.94	-1.66	2.48	-2.38	1.56
D1086.3	O17725	0.00289122	0.0191902	-2.22	-1.64	-0.675	-0.784	-0.0892	1.55
nucl-1	O45181	7.4e-12	0.000262899	-5.08	-1.24	-3.55	1.73	0.292	1.53
B0495.7	Q09216	5.47e-06	0.0115054	-4.08	-1.69	-2.55	1.19	-0.167	1.53
meg-4	Q9TZK8	4.5e-07	1.2e-07	-2.53	-2.81	-1.01	0.79	-1.29	1.52
mog-4	O45244	8.43e-12	0.000134665	-4.96	-1.31	-3.46	1.77	0.191	1.5
T26A5.2	H2KYG8	9.32e-11	2.88e-10	-4.31	-3.97	-2.82	3.83	-2.49	1.48
F59A3.12	P91357	2.22e-08	1.69e-08	-3.69	-3.77	-2.27	3.19	-2.35	1.42
txl-1	G5EES9	4.35e-06	0.00521058	-3.97	-1.83	-2.57	1.61	-0.439	1.4
atg-11	Q22342	1.14e-06	0.000344151	-2.65	-1.55	-1.31	0.188	-0.21	1.34
ife-1	O45551	2.11e-11	3.46e-09	-3.29	-2.27	-1.97	1.58	-0.942	1.33
Y66D12A.19	Q95PZ6	8.49e-13	2.58e-08	-5.2	-2.45	-3.87	3.67	-1.12	1.33
R09E10.6	Q21871	1.28e-08	5.8e-05	-2.95	-1.45	-1.63	0.447	-0.133	1.32
spdl-1	Q17695	1.88e-09	3.36e-08	-3.14	-2.52	-1.82	1.71	-1.2	1.32
mac-1	Q9NAG4	0.000176207	5.34e-05	-1.98	-2.23	-0.664	0.27	-0.919	1.31
gipc-2	Q20393	0.0353941	0.0363701	-1.89	-1.88	-0.583	-0.156	-0.571	1.31
pid-4	O44749	1.4e-07	1.67e-06	-3.07	-2.51	-1.77	1.67	-1.21	1.3
eif-6	O62106	4.34e-05	1.86e-05	-2.68	-2.9	-1.38	1.7	-1.61	1.29
cest-25	Q9BL43	0.0348591	0.00125071	-1.17	-2.01	0.108	-0.658	-0.73	1.28
hsp-110	Q05036	2.1e-07	0.000479833	-3.32	-1.63	-2.06	1.17	-0.369	1.26
parn-1	Q21412	1.69e-05	4.03e-05	-1.9	-1.75	-0.657	-0.0783	-0.507	1.24
edg-1	Q17436	2.3e-10	0.000152303	-4.18	-1.38	-2.94	1.84	-0.14	1.24
C29F7.2	O17621	0.000418536	0.000449034	-1.59	-1.58	-0.401	-0.399	-0.389	1.19
B0261.7	O01442	7.08e-12	4.19e-11	-2.86	-2.52	-1.69	1.87	-1.35	1.17
Q17329	Q17329	7.21e-07	3.3e-08	-2.44	-3.12	-1.28	2.09	-1.96	1.16
ran-2	P34342	1.71e-10	4.27e-07	-2.72	-1.5	-1.58	0.794	-0.357	1.14
rad-50	A5JYU5	9.51e-08	1.88e-07	-2.66	-2.52	-1.53	1.78	-1.39	1.13
rnp-1	Q10667	0.0135381	0.000512542	-1.24	-1.97	-0.111	-0.187	-0.835	1.13
F01G4.4	I2HAE5	7.18e-08	4.09e-07	-2.12	-1.84	-1.01	0.641	-0.737	1.11
F22B5.10	Q19714	0.000159738	0.0015078	-2.81	-2.17	-1.76	1.84	-1.12	1.05
C10G11.8	P91025	0.000880037	0.000578062	-1.46	-1.53	-0.436	-0.0752	-0.511	1.02
nud-1	G5EE74	0.000106165	0.0252635	-3.04	-1.44	-2.02	1.43	-0.422	1.02
K12D12.5	G5ED63	5.44e-10	1.95e-10	-2.44	-2.63	-1.43	2.04	-1.62	1.01
T27E9.2	O45864	0.00173728	0.00262899	-2.43	-2.3	-1.44	1.74	-1.3	0.998
atln-1	U4PLG5	0.0359004	0.00665809	-1.32	-1.8	-0.321	0.132	-0.805	0.995
prp-8	P34369	5.97e-11	0.00219354	-4.61	-1.01	-3.62	2.65	-0.0217	0.99
glh-1	P34689	3.02e-12	9.34e-11	-3.73	-2.92	-2.74	3.68	-1.93	0.989
mob-4	P34349	1.65e-05	0.0142634	-2.6	-1.15	-1.62	0.808	-0.168	0.982
erh-2	Q20057	1.27e-05	0.00253321	-4.32	-2.44	-3.34	3.82	-1.46	0.979
56F11.4	Q9TZ65	2.77e-05	0.0125185	-2.71	-1.28	-1.74	1.1	-0.319	0.966
wago-4	O62275	4.1e-12	2.56e-06	-3.47	-1.26	-2.53	1.91	-0.321	0.939
toca-2	Q9XUS7	0.000348823	0.000550273	-1.86	-1.76	-0.974	0.97	-0.88	0.884
deps-1	Q9N303	6.19e-07	4.06e-08	-1.02	-1.27	-0.151	-0.319	-0.398	0.868
Y71H2AM.1	Q9BL28	7.63e-05	0.000599487	-2.32	-1.86	-1.46	1.59	-0.995	0.864
egg-5	O61789	0.000246419	0.00473966	-2.13	-1.48	-1.27	1.02	-0.612	0.863
H06I04.3	Q5CCJ3	1.79e-06	9.29e-06	-1.8	-1.56	-0.954	0.819	-0.713	0.847
rab-35	Q9U2C3	0.00139734	0.000670582	-1.14	-1.24	-0.295	-0.146	-0.402	0.842
K08F4.3	Q21352	0.00113718	0.00684401	-2.48	-1.94	-1.65	1.93	-1.11	0.83
Y39A3CL.1	Q9N412	3.38e-06	5.61e-05	-1.95	-1.5	-1.12	0.985	-0.683	0.822
C36B1.11	Q93345	1.05e-06	5.81e-07	-2.61	-2.75	-1.8	2.91	-1.93	0.816
ifa-1	A0A4V0IIR6	0.000951079	0.000621806	-1.32	-1.39	-0.52	0.311	-0.588	0.798
par-5	P41932	1.65e-09	6.78e-07	-2.29	-1.44	-1.49	1.33	-0.638	0.798
T23G7.3	Q22705	1.71e-06	2.83e-05	-2.33	-1.81	-1.54	1.76	-1.02	0.792
dpy-30	Q10661	0.00364585	0.00247822	-2	-2.12	-1.26	1.89	-1.37	0.745
F56C9.6	H2KY87	9.44e-09	0.00256661	-3.92	-1.22	-3.19	2.94	-0.491	0.733
tost-1	Q18490	1.15e-06	0.00183654	-3.47	-1.66	-2.75	2.96	-0.935	0.724
Y48B6A.1	Q9U2A9	3.12e-05	0.000288812	-1.85	-1.47	-1.14	1.19	-0.765	0.709
snr-2	P91918	4.65e-05	0.00317845	-2.64	-1.63	-1.96	2.23	-0.949	0.681
Y53C12B.1	O18215	0.00104954	0.0248207	-1.87	-1.15	-1.2	1.01	-0.477	0.673
glh-2	Q966L9	5.66e-11	4.55e-09	-3.38	-2.45	-2.72	3.83	-1.78	0.665
F25H2.4	Q93568	0.000382465	0.000963227	-1.69	-1.52	-1.04	1.25	-0.867	0.654
Y45F10D.7	O62477	0.000753188	0.0157657	-1.72	-1.11	-1.08	0.902	-0.465	0.642
cpn-1	G5EFB5	0.000281593	0.00883879	-2.32	-1.47	-1.68	1.87	-0.835	0.638
rbbp-5	Q09309	0.000551573	0.000866715	-1.65	-1.56	-1.01	1.3	-0.928	0.636
pas-6	O44156	0.00222995	0.0324293	-1.62	-1.04	-0.993	0.771	-0.407	0.629
isy-1	Q20716	5.19e-06	1.11e-05	-1.54	-1.44	-0.915	1.1	-0.814	0.625
F44E2.8	P34438	1.16e-09	0.000658403	-3.76	-1.19	-3.14	3.08	-0.568	0.623
2023-09-01	G5ED39	4.34e-06	5.41e-05	-1.99	-1.58	-1.38	1.72	-0.963	0.617
glo-4	Q5DX34	0.000621763	0.000121822	-1.25	-1.5	-0.64	0.91	-0.884	0.614
app-1	O44750	5.98e-05	1.89e-05	-1.38	-1.54	-0.787	1.14	-0.947	0.594
Y57A10A.13	Q9NA69	0.000148325	0.000851508	-1.26	-1.04	-0.673	0.535	-0.45	0.588
T20F5.6	P91482	0.000352735	0.00393403	-1.38	-1.02	-0.835	0.768	-0.475	0.542
ddx-27	Q95XM9	4.02e-06	0.00120079	-2.08	-1.17	-1.54	1.63	-0.628	0.538
scc-2/pqn-85	Q95XZ5	0.0087799	0.0131314	-1.2	-1.12	-0.685	0.779	-0.605	0.511
E04D5.1	Q19052	6.04e-09	2.17e-06	-2.93	-1.83	-2.42	3.23	-1.32	0.51
T13F2.6	Q94049	0.00052379	0.000394975	-1.62	-1.67	-1.13	1.82	-1.18	0.489
syp-4	Q9N5K3	4.85e-06	6.2e-05	-1.63	-1.29	-1.17	1.54	-0.828	0.459
D2005.7	B3WFW4	1.99e-06	1.29e-06	-2.36	-2.45	-1.91	3.45	-2	0.455
mex-6	Q09436	0.00055759	0.00133599	-1.33	-1.19	-0.887	1.2	-0.754	0.439
rnf-1	O01482	0.00207311	0.00209285	-1.03	-1.03	-0.619	0.82	-0.617	0.416
C33F10.12	Q18390	0.00235943	0.00012648	-1.02	-1.43	-0.652	1.35	-1.07	0.368
xpg-1	O44737	0.0166626	0.01762	-1.27	-1.26	-0.926	1.49	-0.913	0.345
mog-2	Q9BLB6	6.23e-09	1.49e-05	-2.12	-1.12	-1.79	2.24	-0.789	0.334
smi-1	Q9N405	4.06e-05	0.000390115	-1.69	-1.34	-1.36	2.04	-1.01	0.329
mel-47	Q09293	7.16e-06	0.000635988	-2.52	-1.61	-2.2	3.17	-1.29	0.321
pole-1	O62218	0.00172792	0.00361409	-1.29	-1.17	-0.978	1.52	-0.854	0.316
ddx-19	Q22308	1.48e-09	5.85e-06	-2.54	-1.31	-2.27	3.04	-1.04	0.27
pid-3	O76616	1.04e-07	0.000758747	-2.67	-1.17	-2.41	3.06	-0.91	0.26
F40F8.11	H2L297	0.000157007	0.0216625	-2.1	-1.07	-1.88	2.52	-0.852	0.216
W05F2.6	Q9TYT7	5.24e-08	5.91e-06	-2.84	-1.93	-2.63	4.14	-1.72	0.21
sft-4	Q18864	0.00759767	0.0262413	-1.47	-1.18	-1.4	2.42	-1.1	0.0789
Y37H2A.1	Q9U2N7	0.000116053	0.00322936	-1.78	-1.2	-2.14	4.05	-1.56	-0.355

## Sheet: Mutator foci component
Gene_name	Uniprot_ID	WT_vs_MUT-16-TurboID_p.val	PGL-1_TurboID_vs_MUT-16-TurboID_p.val	MUT-16-TurboID_vs_TurboID-ZNFX-1_p.val	WT_vs_MUT-16-TurboID_ratio	PGL-1_TurboID_vs_MUT-16-TurboID_ratio	MUT-16-TurboID_vs_TurboID-ZNFX-1_ratio	WT_centered	PGL-1_TurboID_centered	MUT-16-TurboID_centered	TurboID-ZNFX-1_centered
rde-8	Q23342	5.98e-11	6.93e-10	1.07e-10	-1.53	-7.83	8.98	-2.82	-1.29	6.54	-2.44
mut-16	Q9U3S5	2.6e-14	2.7e-13	1.73e-13	-1.41	-7.87	8.12	-2.96	-1.55	6.31	-1.8
trpp-6	Q9XU81	1.77e-05	3.8e-05	0.000475491	-0.496	-6.66	5.12	-2.42	-1.93	4.73	-0.386
mut-2/rde-3	O44768	1.89e-09	1.33e-09	2.34e-09	0.158	-6.09	5.84	-1.47	-1.62	4.47	-1.37
mut-15	Q22061	9.25e-11	2.26e-10	1.85e-10	-0.386	-5.77	5.85	-1.71	-1.32	4.44	-1.41
rsd-2	Q9XUE3	5.79e-10	3.86e-07	2.62e-05	-3.34	-5.17	3.59	-4.2	-0.853	4.32	0.732
gln-3	Q9U307	6.08e-10	7.42e-10	5.13e-10	-0.0817	-5.55	5.7	-1.41	-1.33	4.22	-1.48
mks-6	Q21303	2.74e-10	1.38e-09	1.45e-09	-0.662	-5.25	5.23	-1.81	-1.15	4.1	-1.13
mut-14	Q17978	1.05e-10	4.7e-07	7.4e-09	-3.19	-3.56	4.93	-2.94	0.248	3.81	-1.12
rrf-1	G3MU40	2.07e-11	5.31e-12	6.96e-11	0.509	-5.49	4.56	-1.22	-1.73	3.76	-0.805
bath-40	Q9NF14	8.16e-13	9.34e-12	1.09e-10	-0.884	-4.68	3.92	-2.02	-1.14	3.54	-0.381
atx-2	G5ED29	2.41e-13	4.23e-06	2.84e-10	-5.01	-1.99	4.22	-3.7	1.31	3.3	-0.918
ZK1307.1	Q09359	1.05e-10	1.72e-10	2.37e-10	-0.151	-4.14	4.04	-1.17	-1.02	3.12	-0.926
ZC247.1	G5EBP5	5.02e-06	5.51e-06	8.26e-06	-0.0312	-3.75	3.62	-0.995	-0.964	2.79	-0.832
rde-2	Q19672	2.58e-08	4.7e-08	2.39e-08	-0.169	-3.58	3.78	-0.975	-0.805	2.78	-0.998
nyn-1	O18125	1.28e-10	2.33e-10	6.98e-10	-0.162	-3.61	3.33	-1.09	-0.931	2.68	-0.652
C33G3.6	Q93321	4.46e-09	5.51e-08	2.43e-08	-0.692	-3.26	3.48	-1.28	-0.59	2.67	-0.803
ain-1	Q17740	6.37e-06	7.32e-06	2.18e-06	-0.0413	-3.32	3.69	-0.769	-0.728	2.59	-1.1
pqn-59	O61708	1.76e-11	1.62e-06	2.48e-08	-2.96	-2.13	2.98	-2.54	0.42	2.55	-0.431
pfd-4	Q17435	1.37e-05	2.54e-05	0.000204604	-0.206	-3.5	2.84	-1.19	-0.987	2.51	-0.329
unc-25	G5EDB7	8.51e-10	3.01e-09	1.21e-09	-0.311	-3.16	3.39	-0.969	-0.658	2.51	-0.88
ampd-1	H2KZ18	1.46e-09	5.7e-08	1.07e-08	-0.927	-2.89	3.28	-1.32	-0.391	2.5	-0.788
F49E2.2	Q20621	0.0314039	0.000662027	0.00107904	1.79	-4	3.77	0.286	-1.5	2.49	-1.28
nyn-2	Q9NA28	3.42e-08	4.37e-08	3.94e-07	-0.0658	-3.41	2.86	-1.04	-0.972	2.44	-0.426
ppk-3	G5ED98	4.69e-08	2.72e-06	4.05e-07	-1.05	-2.67	3.14	-1.34	-0.292	2.38	-0.753
ptrn-1	U4PAZ9	6.68e-07	7.78e-06	3.26e-06	-0.669	-2.86	3.09	-1.16	-0.492	2.37	-0.719
patr-1	Q20374	3.61e-05	5.26e-06	1.44e-05	0.529	-3.27	2.99	-0.493	-1.02	2.25	-0.738
clik-1	Q23050	1.86e-05	6.68e-06	4.65e-06	0.27	-3.05	3.15	-0.535	-0.805	2.24	-0.904
dnbp-1	G5ECK4	6.01e-09	3.45e-06	3.19e-09	-1.31	-1.98	3.46	-1.11	0.2	2.18	-1.27
tbc-2	Q23419	4.56e-08	3.98e-07	1.64e-07	-0.501	-2.67	2.87	-0.994	-0.493	2.18	-0.69
deb-1	P19826	2.58e-09	1.76e-07	3.36e-08	-0.946	-2.47	2.81	-1.24	-0.294	2.17	-0.637
gsnl-1	Q21253	5.63e-10	3.03e-08	5.38e-09	-0.844	-2.42	2.76	-1.15	-0.309	2.11	-0.649
B0361.3	Q7JPQ6	1.27e-06	0.0213845	5.12e-07	-2.36	-1.14	3.77	-1.4	0.96	2.1	-1.67
tap-1	G5EEM6	2.85e-09	1.28e-07	3.72e-06	-0.915	-2.7	2.04	-1.52	-0.609	2.09	0.0457
mut-16	O62011	2.21e-06	1.82e-05	3.02e-06	-0.488	-2.38	2.79	-0.857	-0.369	2.01	-0.782
sec-16a.2	A0A4V0IKA6	1e-06	0.0216399	4.64e-06	-2.33	-1.1	3.01	-1.55	0.788	1.88	-1.13
pfd-6	P52554	2.32e-05	3.93e-06	9.79e-06	0.375	-2.54	2.34	-0.402	-0.777	1.76	-0.58
F13E6.1	P55326	1.6e-06	7.7e-05	2.84e-05	-0.818	-1.93	2.13	-1.05	-0.23	1.7	-0.426
mut-7	P34607	3.13e-06	0.000400804	5.35e-06	-0.988	-1.65	2.51	-0.936	0.0522	1.7	-0.816
ego-2	H8ESG1	6.4e-05	0.0139175	1.14e-06	-1.14	-1.16	3.3	-0.606	0.529	1.69	-1.61
tfg-1	Q9U1W1	2.64e-07	9.44e-06	2.16e-09	-0.548	-1.55	3.04	-0.426	0.122	1.67	-1.37
fln-2	A0A0K3ASM8	2.43e-08	6.65e-07	1.32e-06	-0.612	-2.04	1.92	-0.997	-0.385	1.65	-0.272
cor-1	Q21624	3.73e-07	1.51e-05	1.68e-05	-0.724	-1.94	1.92	-1.03	-0.308	1.63	-0.29
M142.5	Q21541	6.21e-09	8.77e-05	7.73e-08	-1.57	-1.27	2.34	-1.23	0.343	1.61	-0.727
lips-17	Q09611	0.00294078	0.000168926	0.000440885	0.654	-2.26	2.04	-0.131	-0.785	1.48	-0.561
cas-1	H2L023	1.18e-07	1.24e-05	7.79e-06	-0.788	-1.64	1.71	-0.985	-0.196	1.45	-0.266
glna-1	B0M0N9	0.000110782	0.00245288	0.00029186	-0.653	-1.51	1.95	-0.756	-0.103	1.4	-0.546
agef-1	G5EFH7	1.82e-05	1.97e-05	3.53e-05	-0.0135	-1.86	1.76	-0.5	-0.487	1.37	-0.387
tes-1	Q17525	0.00539183	3.23e-06	0.000421428	1.45	-2.63	1.64	0.183	-1.27	1.36	-0.277
C29F5.1	Q18310	5.08e-07	1.15e-05	7.37e-05	-0.518	-1.69	1.42	-0.88	-0.361	1.33	-0.0882
F10C1.9	G4S1A4	0.0008667	1.19e-06	0.00573469	1.29	-2.72	1.11	-0.117	-1.4	1.32	0.206
F40A3.6	O16266	0.00067911	0.00321236	0.000806656	-0.342	-1.55	1.85	-0.568	-0.226	1.32	-0.53
sao-1	C6KRN1	2.3e-06	2.54e-05	3.36e-07	-0.339	-1.42	2.06	-0.448	-0.109	1.31	-0.753
mrps-15	Q9NAP9	4.74e-06	5.6e-05	3.45e-05	-0.395	-1.54	1.62	-0.664	-0.269	1.28	-0.343
sago-2	A0A0U1RML5	4.96e-05	0.0116676	0.000239753	-1.06	-1.09	1.83	-0.883	0.176	1.27	-0.562
unk-1	Q18437	5.06e-05	0.000144318	0.000113354	-0.179	-1.61	1.65	-0.528	-0.348	1.26	-0.389
spc-1	G4S034	7.13e-05	0.00833241	0.0139046	-1.05	-1.32	1.21	-1.15	-0.095	1.23	0.0155
denn-4	U4PM26	2.38e-05	0.000470913	1.15e-05	-0.44	-1.23	1.78	-0.498	-0.0583	1.17	-0.613
unc-112	Q18685	0.000903599	0.0130816	0.0273403	-0.659	-1.4	1.22	-0.89	-0.232	1.17	-0.0467
ketn-1	H2L075	6.73e-08	4.53e-07	2.09e-06	-0.237	-1.44	1.27	-0.581	-0.344	1.1	-0.172
ndx-9	B3GWC0	1.98e-05	0.00249365	0.00017997	-0.7	-1	1.37	-0.684	0.0163	1.02	-0.351
Y79H2A.3	H8ESF6	0.000177536	0.00412373	0.00905462	-0.555	-1.19	1.05	-0.747	-0.192	0.994	-0.0557
C39D10.8	H2KYM1	0.000497355	0.00115026	0.000944941	-0.12	-1.14	1.17	-0.368	-0.248	0.892	-0.276
